# Supplementary material for: Hoogsteen triplexes stabilized through ethynyl-linked pyrene-indole synthesized by high-temperature Sonogashira coupling
Source: Royal Society of Chemistry journal article supplement (doi:10.1039/d2ob01466a), 2022-01-01

## Hoogsteen triplexes stabilized through ethynyl-linked pyrene-indole synthesized by high-temperature Sonogashira coupling

Imrich Géci,<sup>\*a,c</sup> Maha I. Fatthalla,<sup>b,c,d</sup> Maike Heintz,<sup>c</sup> Per T. Jørgensen<sup>c</sup> and Erik B. Pedersen<sup>c</sup>

<sup>a</sup> Department of Medical and Clinical Biophysics, Faculty of Medicine, P. J. Šafárik University in Košice, Trieda SNP 1, 04011 Košice, Slovakia.

<sup>b</sup> Department of Chemistry, Faculty of Science, Helwan University, 11795 Ain Helwan, Cairo, Egypt.

<sup>c</sup> Department of Physics, Chemistry and Pharmacy, University of Southern Denmark, Campusvej 55, DK-5230, Odense M, Denmark.

<sup>d</sup> Université Paris-Sud, CNRS, Faculté de Pharmacie, 5 rue J.-B. Clément, Chatenay-Malabry, 92296 France

E-mail: imrich.geci@upjs.sk

### Electronic Supplementary Information

#### Contents

|                                               |    |
|-----------------------------------------------|----|
| Numerical listing of NMR data .....           | 2  |
| HPLC profiles of oligonucleotides.....        | 5  |
| References.....                               | 6  |
| NMR spectra, compound 3.....                  | 7  |
| NMR spectra and MS spectra, compound 5 .....  | 9  |
| NMR spectra and MS spectra, compound 6 .....  | 12 |
| NMR spectra and MS spectra, compound 7 .....  | 15 |
| NMR spectra and MS spectra, compound 9 .....  | 18 |
| NMR spectra and MS spectra, compound 10 ..... | 21 |

### Numerical listing of NMR spectra:

#### **(S)-4-tosyloxy-1,2-O-isopropylidene-1,2-butanediol (3).**

$^1\text{H}$  NMR (400 MHz,  $\text{CDCl}_3$ )  $\delta$  7.80 – 7.78 (m, 2H, Ar), 7.36 – 7.34 (m, 2H, Ar), 4.20 – 4.08 (m, 3H,  $\text{CH}_2\text{OTs} + \text{CH}_2\text{CHO}$ ), 4.01 (dd,  $J = 8.1, 6.0$  Hz, 1H,  $\text{CHHO}$ ), 3.51 (dd,  $J = 8.1, 6.9$  Hz, 1H,  $\text{CHHO}$ ), 2.45 (s, 3H,  $\text{CH}_3$ ), 1.93 – 1.85 (m, 2H,  $\text{CH}_2\text{CH}_2\text{N}$ ), 1.34 (d,  $J = 0.7$  Hz, 3H,  $\text{CH}_3$ ), 1.29 (d,  $J = 0.8$  Hz, 3H,  $\text{CH}_3$ ). The  $^1\text{H}$ -NMR data is consistent with the literature data.<sup>1</sup>

$^{13}\text{C}$  NMR (101 MHz,  $\text{CDCl}_3$ )  $\delta$  144.85, 132.92, 129.88, 127.89 (OTs), 108.99 ( $\text{C}(\text{CH}_3)_2$ ), 72.28 ( $\text{CHOC}(\text{CH}_3)_2$ ), 69.06 ( $\text{CH}_2\text{O}$ ), 67.43 ( $\text{CH}_2\text{OTs}$ ), 33.13 ( $\text{CH}_2\text{CH}_2\text{N}$ ), 26.83 ( $\text{CH}_3$ ), 25.53 ( $\text{CH}_3$ ), 21.62 ( $\text{CH}_3$ ).

#### **(S)-1-(2-(2,2-dimethyl-1,3-dioxolan-4-yl)ethyl)-5-iodo-1H-indole (5).**

$^1\text{H}$  NMR (400 MHz,  $\text{CDCl}_3$ )  $\delta$  7.93 (d,  $J = 1.6$  Hz, 1H, Ar), 7.41 (dd,  $J = 8.6, 1.7$  Hz, 1H, Ar), 7.12 (d,  $J = 8.7$  Hz, 1H, Ar), 7.05 (d,  $J = 3.1$  Hz, 1H, Ar), 6.39 (dd,  $J = 3.2, 0.9$  Hz, 1H, Ar), 4.22 (m, 2H,  $\text{CH}_2\text{N}$ ), 3.94 – 3.88 (m, 2H,  $\text{CH}_2\text{O}$ ), 3.45 – 3.41 (m, 1H,  $\text{CH}_2\text{CHO}$ ), 2.01 – 1.92 (m, 2H,  $\text{CH}_2\text{CH}_2\text{N}$ ), 1.44 (s, 3H,  $\text{CH}_3$ ), 1.32 (s, 3H,  $\text{CH}_3$ ).

$^{13}\text{C}$  NMR (101 MHz,  $\text{CDCl}_3$ )  $\delta$  135.10, 131.21, 129.83, 128.79, 111.50, 109.22, 100.75 (Ar +  $\text{C}(\text{CH}_3)_2$ ), 82.97 (C-I), 72.93 ( $\text{CHOC}(\text{CH}_3)_2$ ), 69.10 ( $\text{CH}_2\text{O}$ ), 43.20 ( $\text{CH}_2\text{CH}_2\text{N}$ ), 34.38 ( $\text{CH}_2\text{CH}_2\text{N}$ ), 27.18 ( $\text{CH}_3$ ), 25.68 ( $\text{CH}_3$ ).

EI-MS:  $m/z = 371$  (1) [ $\text{M}^+$ ], 356 (26), 296 (18), 256 (98), 169 (25), 129 (60), 102 (16), 43 (73).

#### **(S)-4-(5-iodo-1H-indol-1-yl)butane-1,2-diol (6).**

$^1\text{H}$  NMR (400 MHz, DMSO)  $\delta$  7.91 (dd,  $J = 1.6, 0.6$  Hz, 1H, Ar), 7.40 – 7.33 (m, 3H, Ar), 6.40 (dd,  $J = 3.1, 0.7$  Hz, 1H, Ar), 4.73 (d,  $J = 4.7$  Hz, 1H,  $\text{CHOH}$ ), 4.55 – 4.27 (t,  $J = 5.5$ , 1H,  $\text{CH}_2\text{OH}$ ), 4.25 (m, 2H,  $\text{CH}_2\text{N}$ ), 3.33 – 3.18 (m, 3H,  $\text{CH}_2\text{OH} + \text{CHOH}$ ), 1.94 (m, 1H,  $\text{CHHCH}_2\text{N}$ ), 1.64 (m, 1H,  $\text{CHHCH}_2\text{N}$ ).

$^{13}\text{C}$  NMR (101 MHz, DMSO)  $\delta$  134.61, 130.72, 129.65, 128.64, 128.62, 112.24, 99.66 (Ar), 82.50 (C-I), 68.33 ( $\text{CHOH}$ ), 65.71 ( $\text{CH}_2\text{OH}$ ), 42.40 ( $\text{CH}_2\text{CH}_2\text{N}$ ), 33.94 ( $\text{CH}_2\text{CH}_2\text{N}$ ).

EI-MS:  $m/z = 331$  (1) [ $\text{M}^+$ ], 256 (75), 243 (15), 129 (73), 102 (31), 32 (87).

**(S)-1-(bis(4-methoxyphenyl)(phenyl)methoxy)-4-(5-iodo-1H-indol-1-yl) butan-2-ol (7).**

$^1\text{H}$  NMR (400 MHz,  $\text{CDCl}_3$ )  $\delta$  7.94 (d,  $J = 1.6$  Hz, 1H, Ar), 7.42 – 7.35 (m, 3H, Ar), 7.29 – 7.26 (m, 2H, Ar), 7.24 (d,  $J = 1.8$  Hz, 2H, Ar), 7.22 – 7.16 (m, 2H, Ar), 7.12 (d,  $J = 8.6$  Hz, 1H, Ar), 7.04 (d,  $J = 3.1$  Hz, 1H, Ar), 6.84 – 6.79 (m, 5H, Ar), 6.38 (dd,  $J = 3.1, 0.8$  Hz, 1H, Ar), 4.29 – 4.18 (m, 2H,  $\text{CH}_2\text{N}$ ), 3.80 (d,  $J = 6.6$  Hz, 6H,  $\text{OCH}_3$ ), 3.78 (m, 1H,  $\text{CHOH}$ ), 3.08 (dd,  $J = 9.4, 3.4$  Hz, 1H,  $\text{CHHODMT}$ ), 2.99 (dd,  $J = 9.4, 7.3$  Hz, 1H,  $\text{CHHODMT}$ ), 2.36 (d,  $J = 3.8$  Hz, 1H,  $\text{CHOH}$ ), 1.87 – 1.78 (m, 2H,  $\text{CH}_2\text{CH}_2\text{N}$ ).

$^{13}\text{C}$  NMR (101 MHz,  $\text{CDCl}_3$ )  $\delta$  158.54, 144.55, 139.45, 135.72, 135.01, 131.11, 129.96, 129.65, 129.12, 128.79, 128.04, 127.86, 113.16, 111.44, 100.48 (Ar), 86.22 ( $\text{Ar}_3\text{C}$ ), 82.73 (C-I), 67.86 ( $\text{CH}_2\text{ODMT}$ ), 67.25 ( $\text{CHOH}$ ), 55.23 ( $2\times\text{O}-\text{CH}_3$ ), 42.58 ( $\text{CH}_2\text{CH}_2\text{N}$ ), 33.60 ( $\text{CH}_2\text{CH}_2\text{N}$ ).

ESI-MS (TOF):  $m/z$  calcd. for  $\text{C}_{33}\text{H}_{32}\text{NO}_4$  [ $\text{M}^+$ ] 633.1376, found 633.1395.

**(S)-1-(bis(4-methoxyphenyl)(phenyl)methoxy)-4-(5-(2-(pyren-1-yl)ethynyl)-1H-indol-1-yl)butan-2-ol (9).**

$^1\text{H}$  NMR (400 MHz,  $\text{CDCl}_3$ )  $\delta$  8.75 (d,  $J = 9.1$  Hz, 1H, Ar), 8.23 – 8.14 (m, 4H, Ar), 8.12 (d,  $J = 8.0$  Hz, 1H, Ar), 8.09 – 8.00 (m, 4H, Ar), 7.56 (dd,  $J = 8.5, 1.5$  Hz, 1H, Ar), 7.40 – 7.37 (m, 3H, Ar), 7.29 – 7.21 (m, 7H, Ar), 7.15 (d,  $J = 3.1$  Hz, 1H, Ar), 6.83 – 6.80 (m, 4H, Ar), 6.53 (d,  $J = 3.1$  Hz, 1H, Ar), 4.30 (q,  $J = 6.3, 5.9$  Hz, 2H,  $\text{CH}_2\text{N}$ ), 3.78 (s, 6H,  $\text{OCH}_3$ ), 3.69 (m, 1H,  $\text{CHOH}$ ), 3.11 (dd,  $J = 9.5, 3.4$  Hz, 1H,  $\text{CHHODMT}$ ), 3.03 (dd,  $J = 9.4, 7.3$  Hz, 1H,  $\text{CHHODMT}$ ), 2.55 (m,  $J = 114.9$  Hz, 1H,  $\text{CHOH}$ ) 1.91 (m, 2H,  $\text{CH}_2\text{CH}_2\text{N}$ ).

$^{13}\text{C}$  NMR (101 MHz,  $\text{CDCl}_3$ )  $\delta$  158.56, 144.61, 135.77, 131.72, 131.35, 131.21, 130.81, 130.00, 129.45, 129.12, 128.60, 128.08, 127.90, 127.80, 127.32, 126.93, 126.15, 125.87, 125.42, 125.35, 125.21, 124.98, 124.60, 124.57, 124.47, 114.04, 113.19, 109.69, 101.64, 97.18 (Ar), 90.03 ( $\text{C}\equiv\text{C}$ ), 89.49 ( $\text{C}\equiv\text{C}$ ), 86.26 ( $\text{Ar}_3\text{C}$ ), 67.33 ( $\text{CH}_2\text{ODMT}$ ), 66.66 ( $\text{CHOH}$ ), 55.24 ( $2\times\text{O}-\text{CH}_3$ ), 42.70 ( $\text{CH}_2\text{CH}_2\text{N}$ ), 33.72 ( $\text{CH}_2\text{CH}_2\text{N}$ ).

ESI-MS (TOF):  $m/z$  calcd. for  $\text{C}_{51}\text{H}_{41}\text{NO}_3 \text{Na}^+$  [ $\text{MNa}^+$ ] 754.2928, found 754.2937.

**(S)-1-(bis(4-methoxyphenyl)(phenyl)methoxy)-4-(5-(2-(pyren-1-yl)ethynyl)-1H-indol-1-yl)butan-2-yl) 2cyanoethyl-diisopropylphosphoramidite (10).**

$^1\text{H}$  NMR (400 MHz,  $\text{CDCl}_3$ )  $\delta$  8.75 (dd,  $J = 9.1, 1.1$  Hz, 1H, Ar), 8.21 (dd,  $J = 11.9, 8.7$  Hz, 4H, Ar), 8.14 (d,  $J = 8.0$  Hz, 1H, Ar), 8.10 – 8.02 (m, 4H, Ar), 7.52 (dt,  $J = 8.5, 1.7$  Hz, 1H, Ar), 7.44 (dt,  $J = 8.1, 1.6$  Hz, 2H, Ar), 7.30 (m, 6H, Ar), 7.26 – 7.18 (m, 2H, Ar), 7.14 (dd,  $J = 9.2, 3.1$  Hz, 1H, Ar), 6.82 (ddd,  $J = 8.7, 6.8, 1.7$  Hz, 4H, Ar), 6.52 (dd,  $J = 7.1, 3.1$  Hz, 1H, Ar), 4.21 (m, 2H,  $\text{CH}_2\text{N}$ ), 4.09 – 3.98 (m, 1H, ( $\text{OCH}_2\text{CH}_2\text{CN}$ )), 3.89 – 3.82 (m, 1H, ( $\text{OCH}_2\text{CH}_2\text{CN}$ )), 3.79 (dd,  $J = 2.7, 1.2$  Hz, 6H,  $\text{OCH}_3$ ), 3.76 – 3.70 (m, 1H, CHOP), 3.64 (m, 2H,  $\text{CH}_2\text{ODMT}$ ), 3.24 (m, 1H,  $\text{OCH}_2\text{CH}_2\text{CN}$ ), 3.09 (m, 1H,  $\text{OCH}_2\text{CH}_2\text{CN}$ ), 2.60 (t,  $J = 6.4$  Hz, 1H, ( $\text{NCH}(\text{CH}_3)_2$ )), 2.39 (t,  $J = 6.5$  Hz, 1H, ( $\text{NCH}(\text{CH}_3)_2$ )), 2.35 – 2.24 (m, 1H,  $\text{CH}_2\text{CH}_2\text{N}$ ), 2.23 – 2.12 (m, 1H,  $\text{CH}_2\text{CH}_2\text{N}$ ), 1.22 – 1.18 (m, 9H,  $3\times\text{CH}_3$ ), 1.14 (d,  $J = 6.8$  Hz, 3H,  $\text{CH}_3$ ).

$^{13}\text{C}$  NMR (101 MHz,  $\text{CDCl}_3$ )  $\delta$  158.67, 158.63, 144.95, 144.93, 136.25, 136.13, 135.80, 131.86, 131.50, 131.37, 130.96, 130.25, 130.23, 130.17, 129.59, 129.18, 129.02, 128.85, 128.37, 128.32, 128.21, 127.96, 127.47, 126.98, 126.91, 126.30, 126.02, 125.56, 125.50, 125.35, 125.27, 125.16, 125.12, 124.76, 124.71, 124.62, 119.01, 118.98, 117.84, 117.66, 114.21, 114.12, 113.26, 109.97, 109.90, 101.72, 101.61, 97.41, 97.35 (Ar), 86.46 ( $\text{C}\equiv\text{C}$ ), 86.42 ( $\text{C}\equiv\text{C}$ ), 86.25 ( $\text{OCPh}_3$ ), 71.56 (CHOP), 71.50 (CHOP), 65.73 ( $\text{CH}_2\text{ODMT}$ ), 65.56 ( $\text{CH}_2\text{ODMT}$ ), 58.17 ( $\text{OCH}_2\text{CH}_2\text{CN}$ ), 58.14 ( $\text{OCH}_2\text{CH}_2\text{CN}$ ), 55.39 ( $2\times\text{OCH}_3$ ), 43.48 ( $\text{NCH}(\text{CH}_3)_2$ ), 43.41 ( $\text{NCH}(\text{CH}_3)_2$ ), 43.36 ( $\text{NCH}(\text{CH}_3)_2$ ), 43.28 ( $\text{NCH}(\text{CH}_3)_2$ ), 42.94 ( $\text{CH}_2\text{CH}_2\text{N}$ ), 42.84 ( $\text{CH}_2\text{CH}_2\text{N}$ ), 34.15 ( $\text{CH}_2\text{CH}_2\text{N}$ ), 33.87 ( $\text{CH}_2\text{CH}_2\text{N}$ ), 24.96 ( $\text{CH}_3$ ), 24.92 ( $\text{CH}_3$ ), 24.88 ( $\text{CH}_3$ ), 24.85 ( $\text{CH}_3$ ), 24.79 ( $\text{CH}_3$ ), 24.72 ( $\text{CH}_3$ ), 23.71 ( $\text{CH}_3$ ), 23.10 ( $\text{CH}_3$ ), 19.21 ( $\text{CH}_2\text{CN}$ ), 19.17 ( $\text{CH}_2\text{CN}$ ).

$^{31}\text{P}$  NMR ( $\text{CDCl}_3$ , 162 MHz):  $\delta = 148.97, 148.44$  in a 5:6 ratio.

ESI-MS (TOF):  $m/z$  calcd. for  $\text{C}_{60}\text{H}_{58}\text{N}_3\text{O}_5\text{P Na}^+ [\text{MNa}^+]$  954.4012, found 954.4048.

### HPLC chromatograms of oligonucleotides:

DMT-on oligonucleotides (ONs) were purified using a reverse-phase semipreparative HPLC (Waters Xterra MS C<sub>18</sub> column) with a Waters Delta Prep 4000 Preparative Chromatography System and using following buffers: Buffer A [0.05m triethyl ammonium acetate in H<sub>2</sub>O (pH 7.0)] and Buffer B (75% CH<sub>3</sub>CN in H<sub>2</sub>O). Gradients: 2 min 100% A, linear gradient to 70% B in 40 min, linear gradient to 100% B in 7 min, 100% B in 3 min and then 100% A in 10 min). Flow 2.5 mLmin<sup>-1</sup>.

**ON2** 5'-CCCCTTYTCTTTTT, retention time 30,25 min

**ON3** 5'-CCCCTTY<sup>l-ind</sup>TCTTTTT, retention time 31,41 min

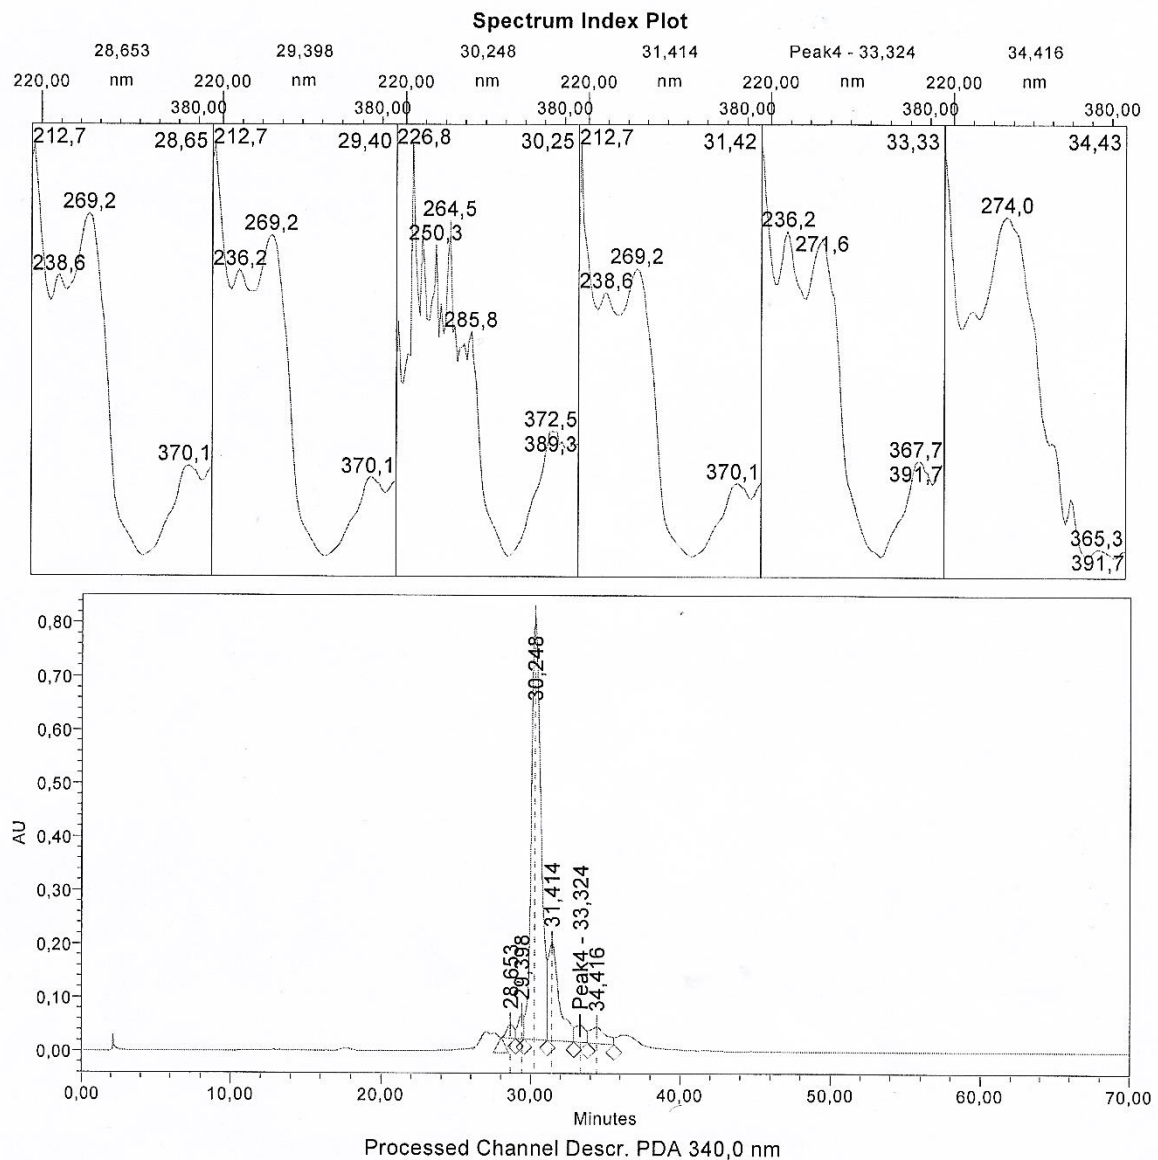

ON4 5'-YCCCCCTTTCTTTTTT, retention time 42,58 min

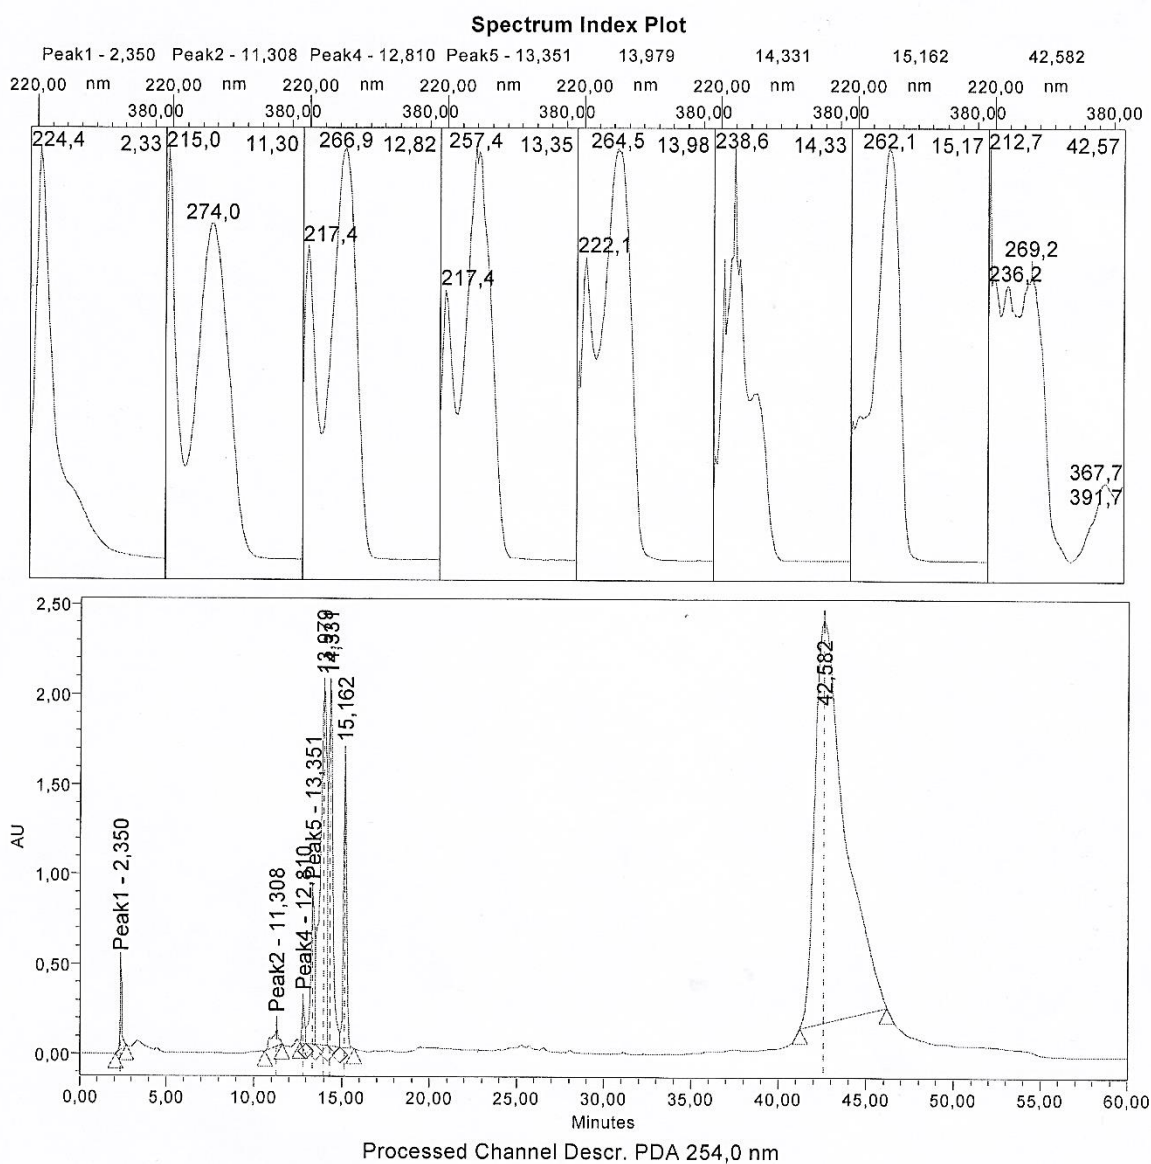

**References:**

1. L. Börjesson and C. J. Welch, Tetrahedron 1992, 48, 6325.

<sup>1</sup>H-NMR:

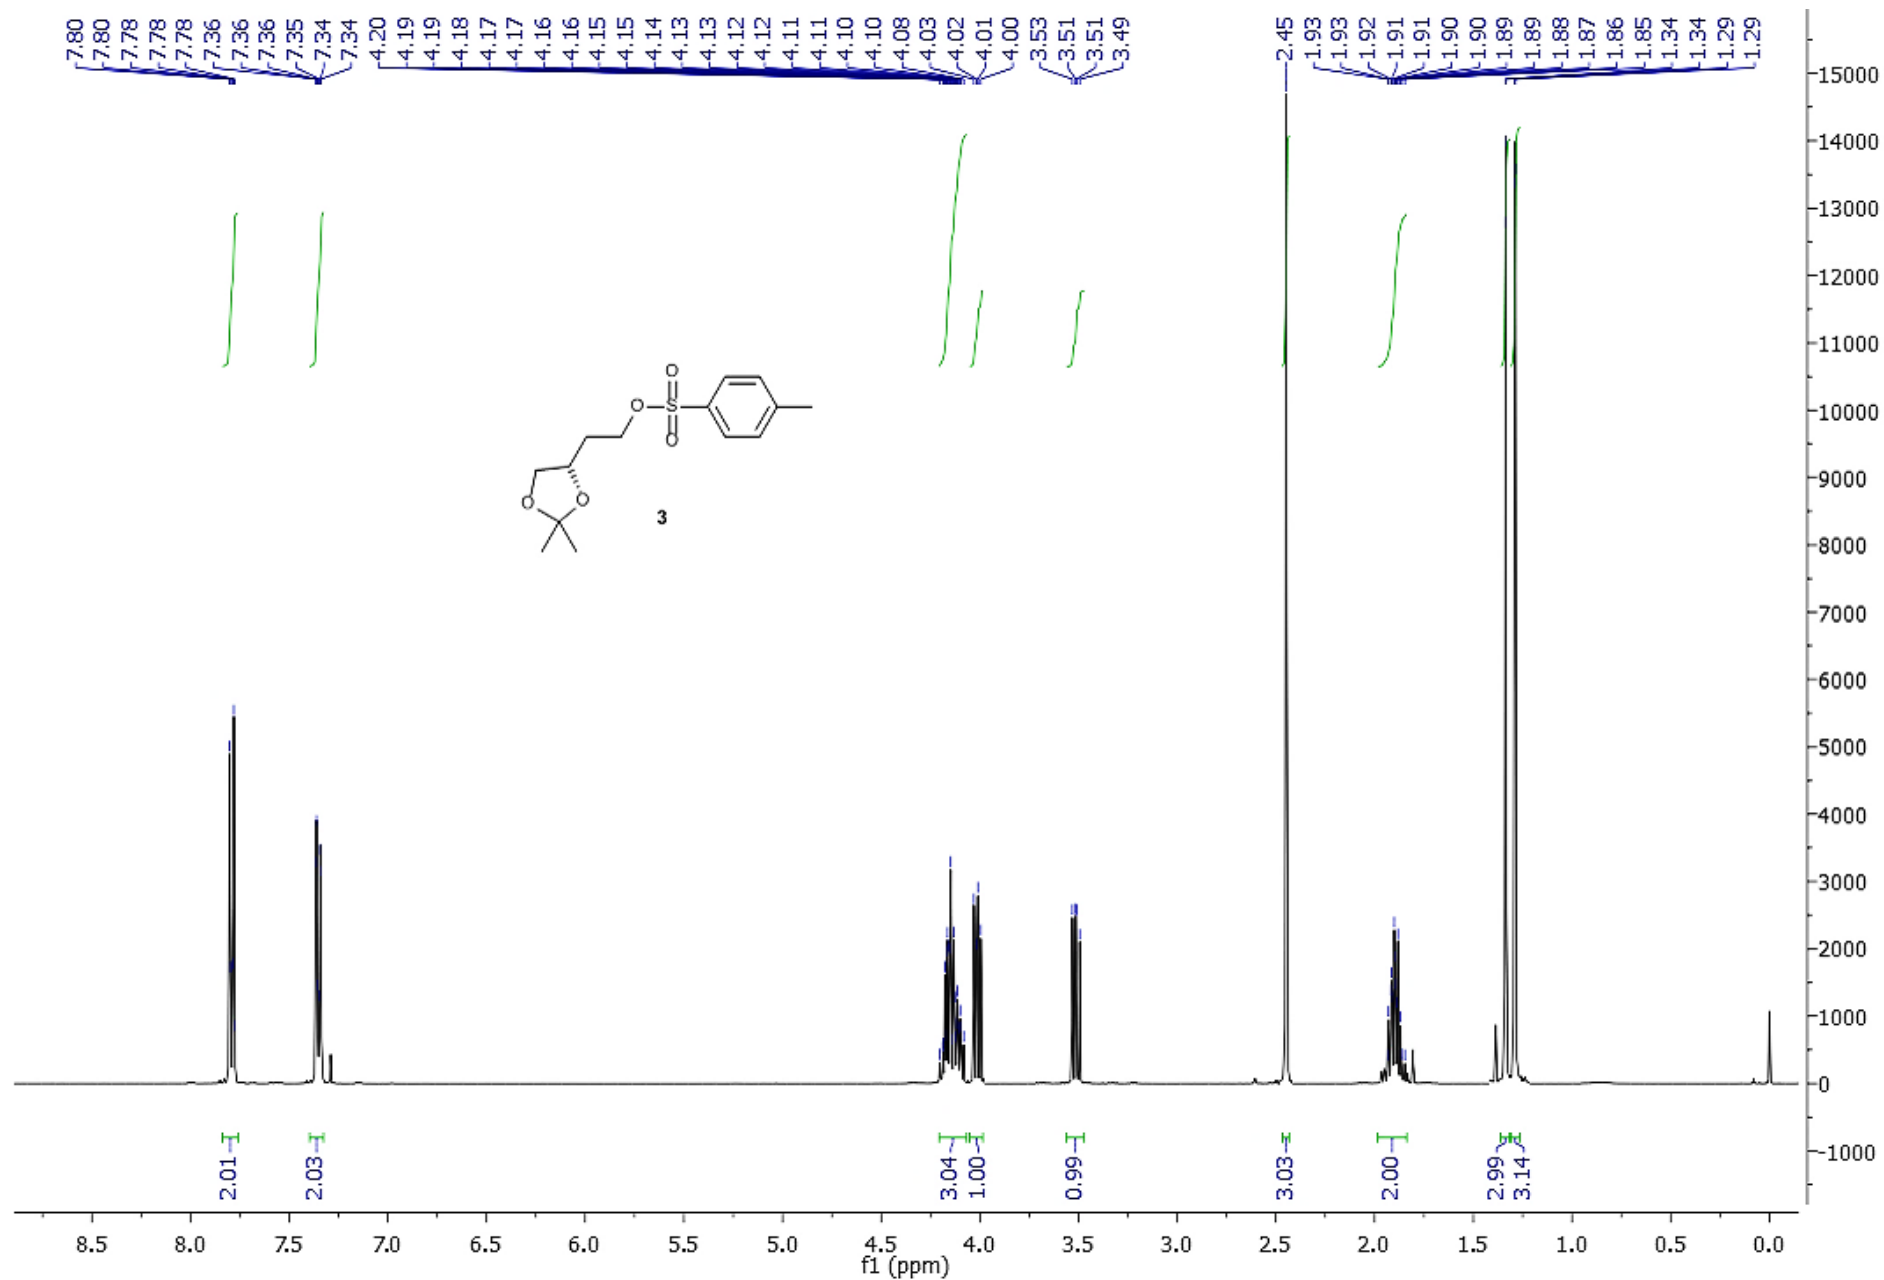

<sup>13</sup>C-NMR:

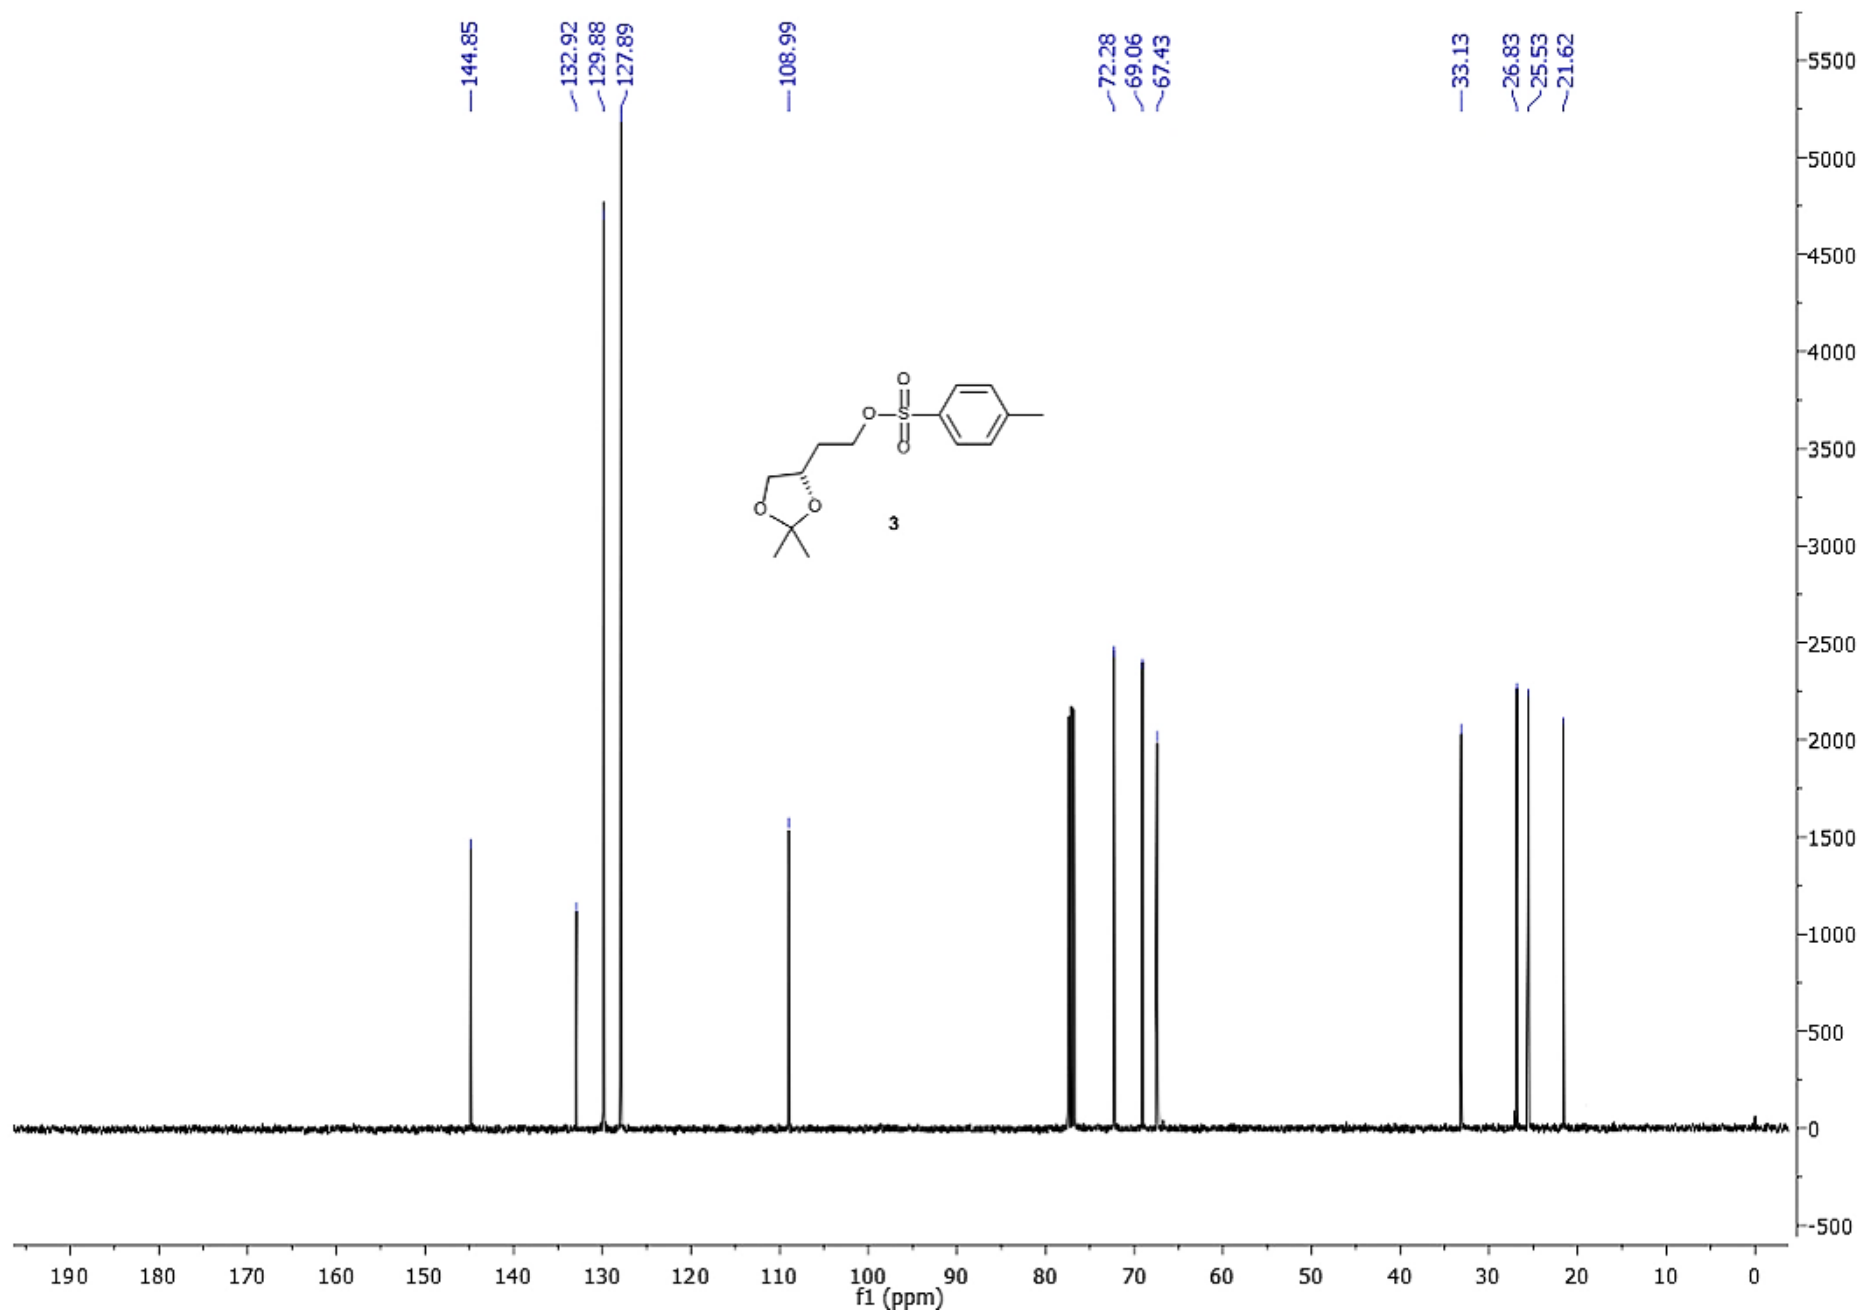



<sup>1</sup>H-NMR:

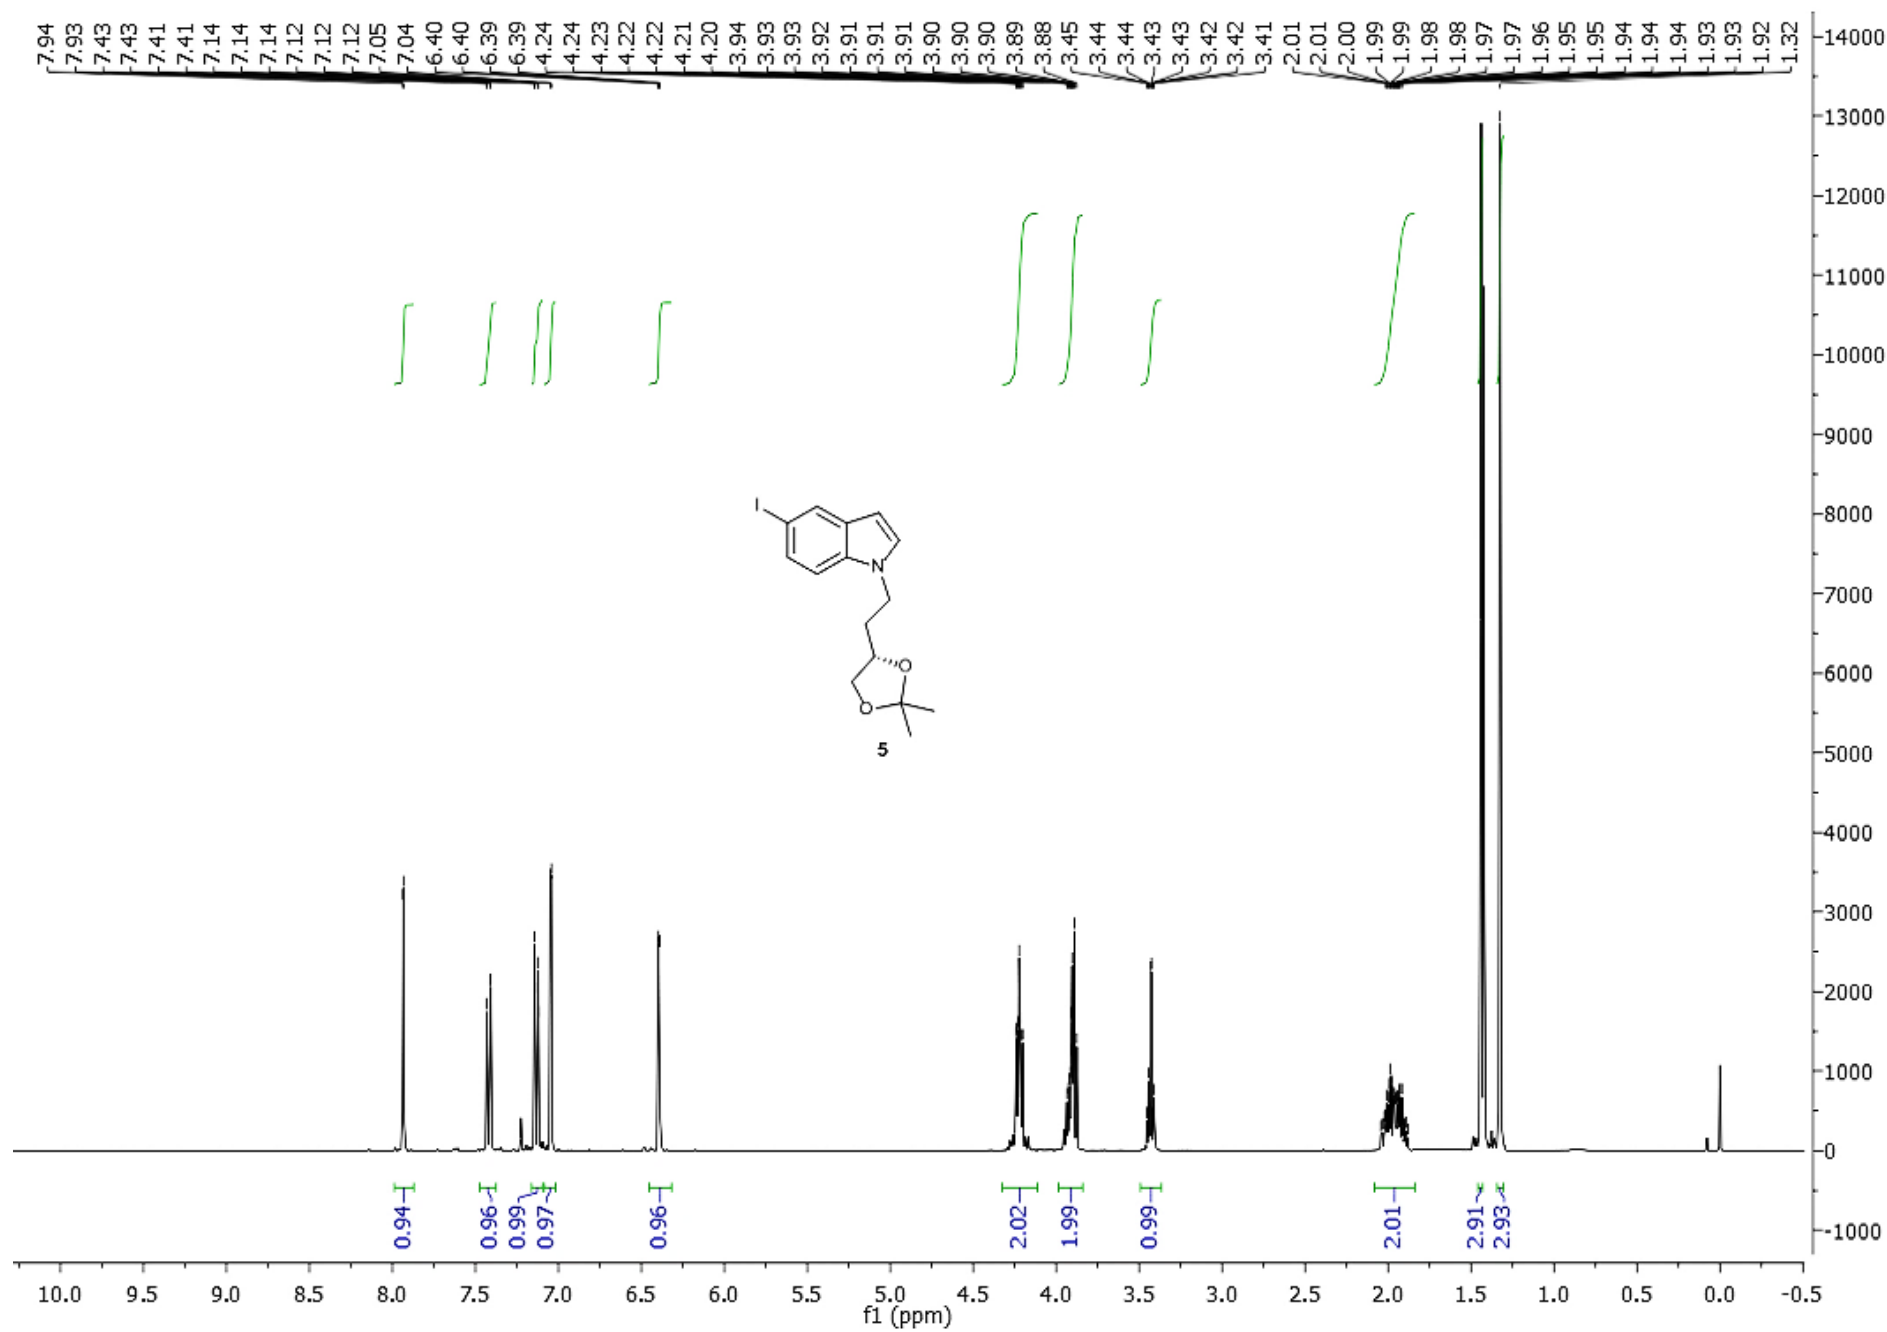

<sup>13</sup>C-NMR:

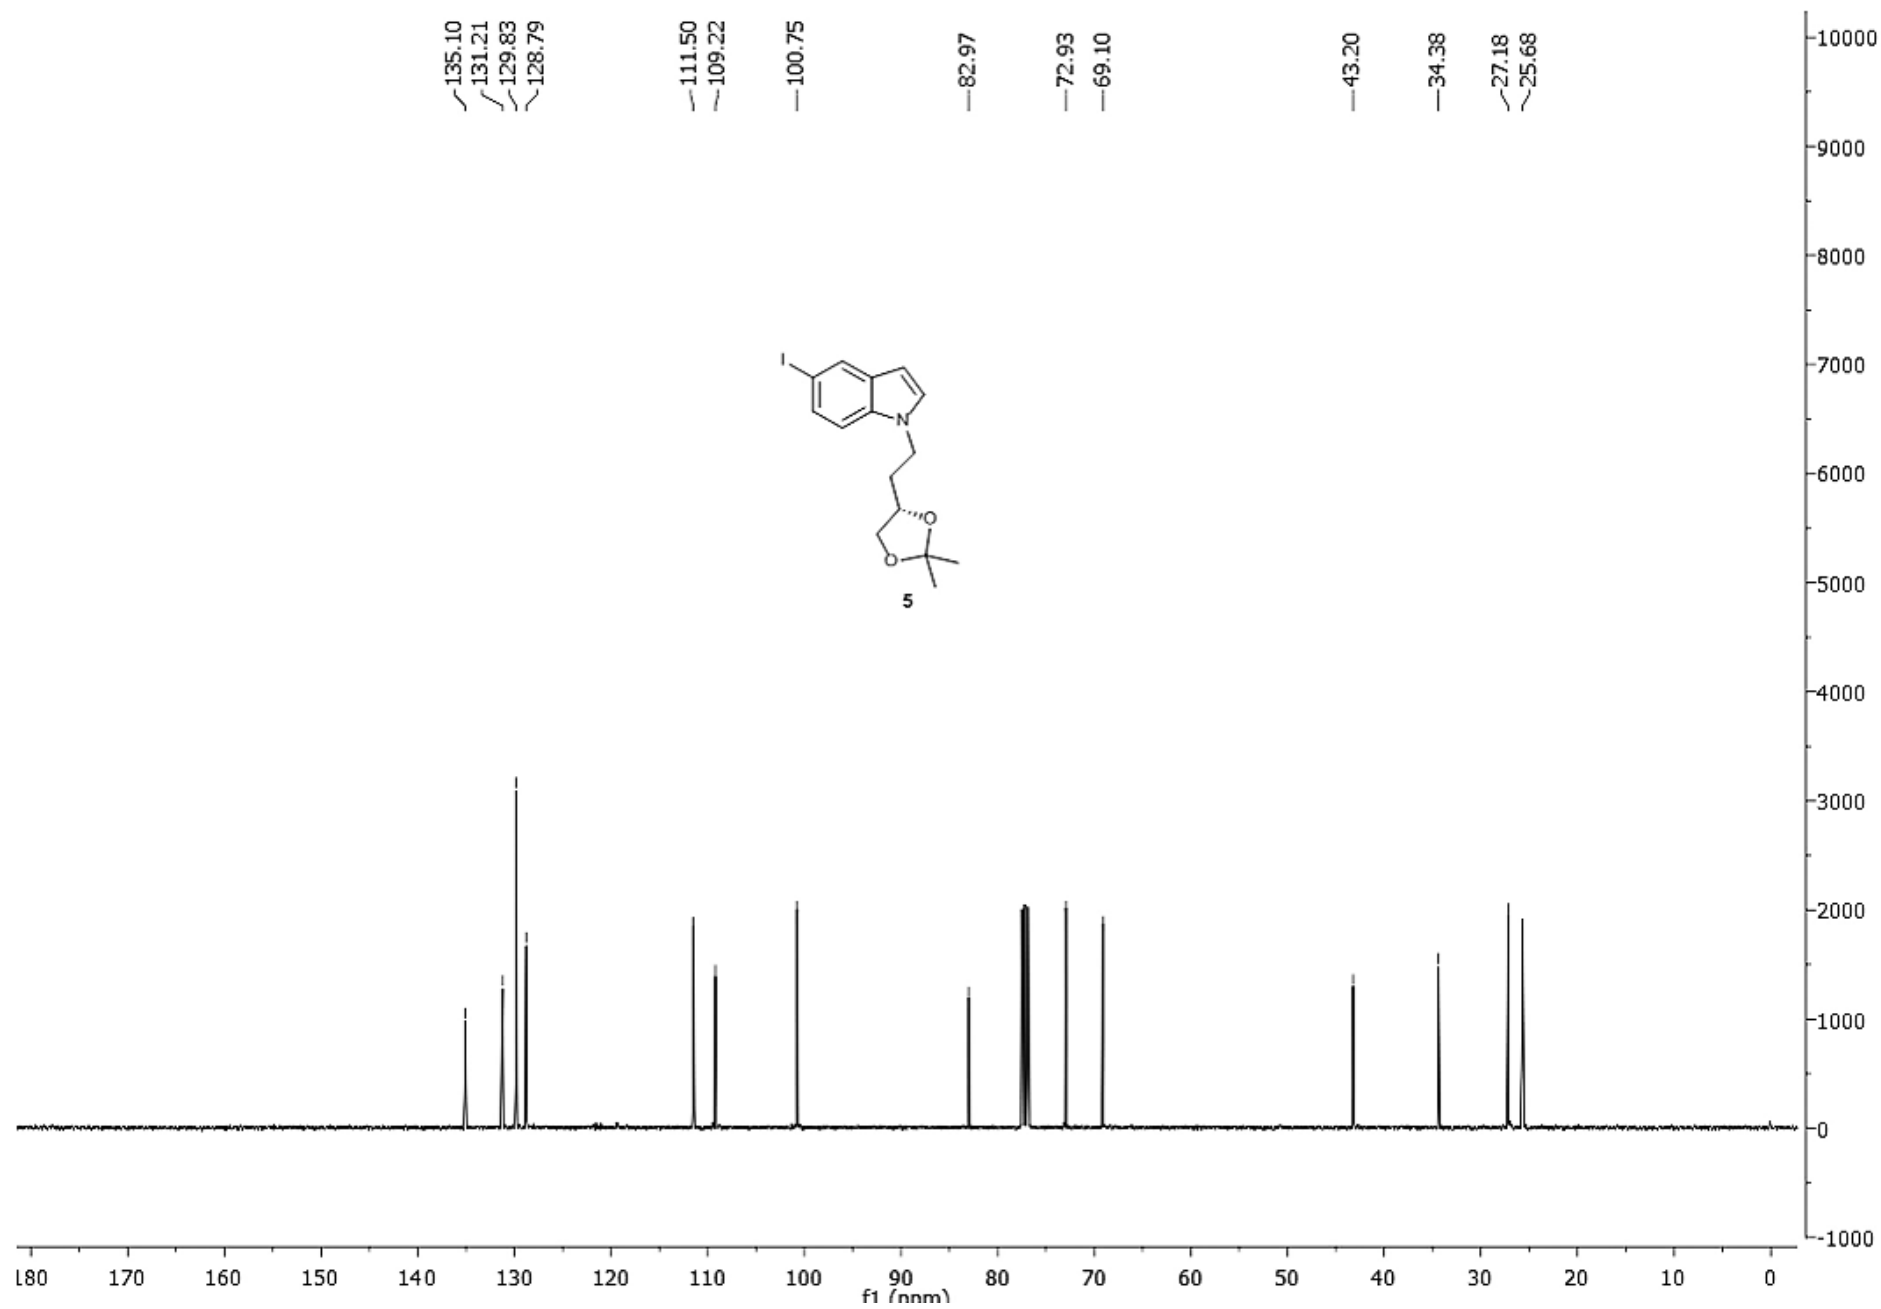

EI-MS:

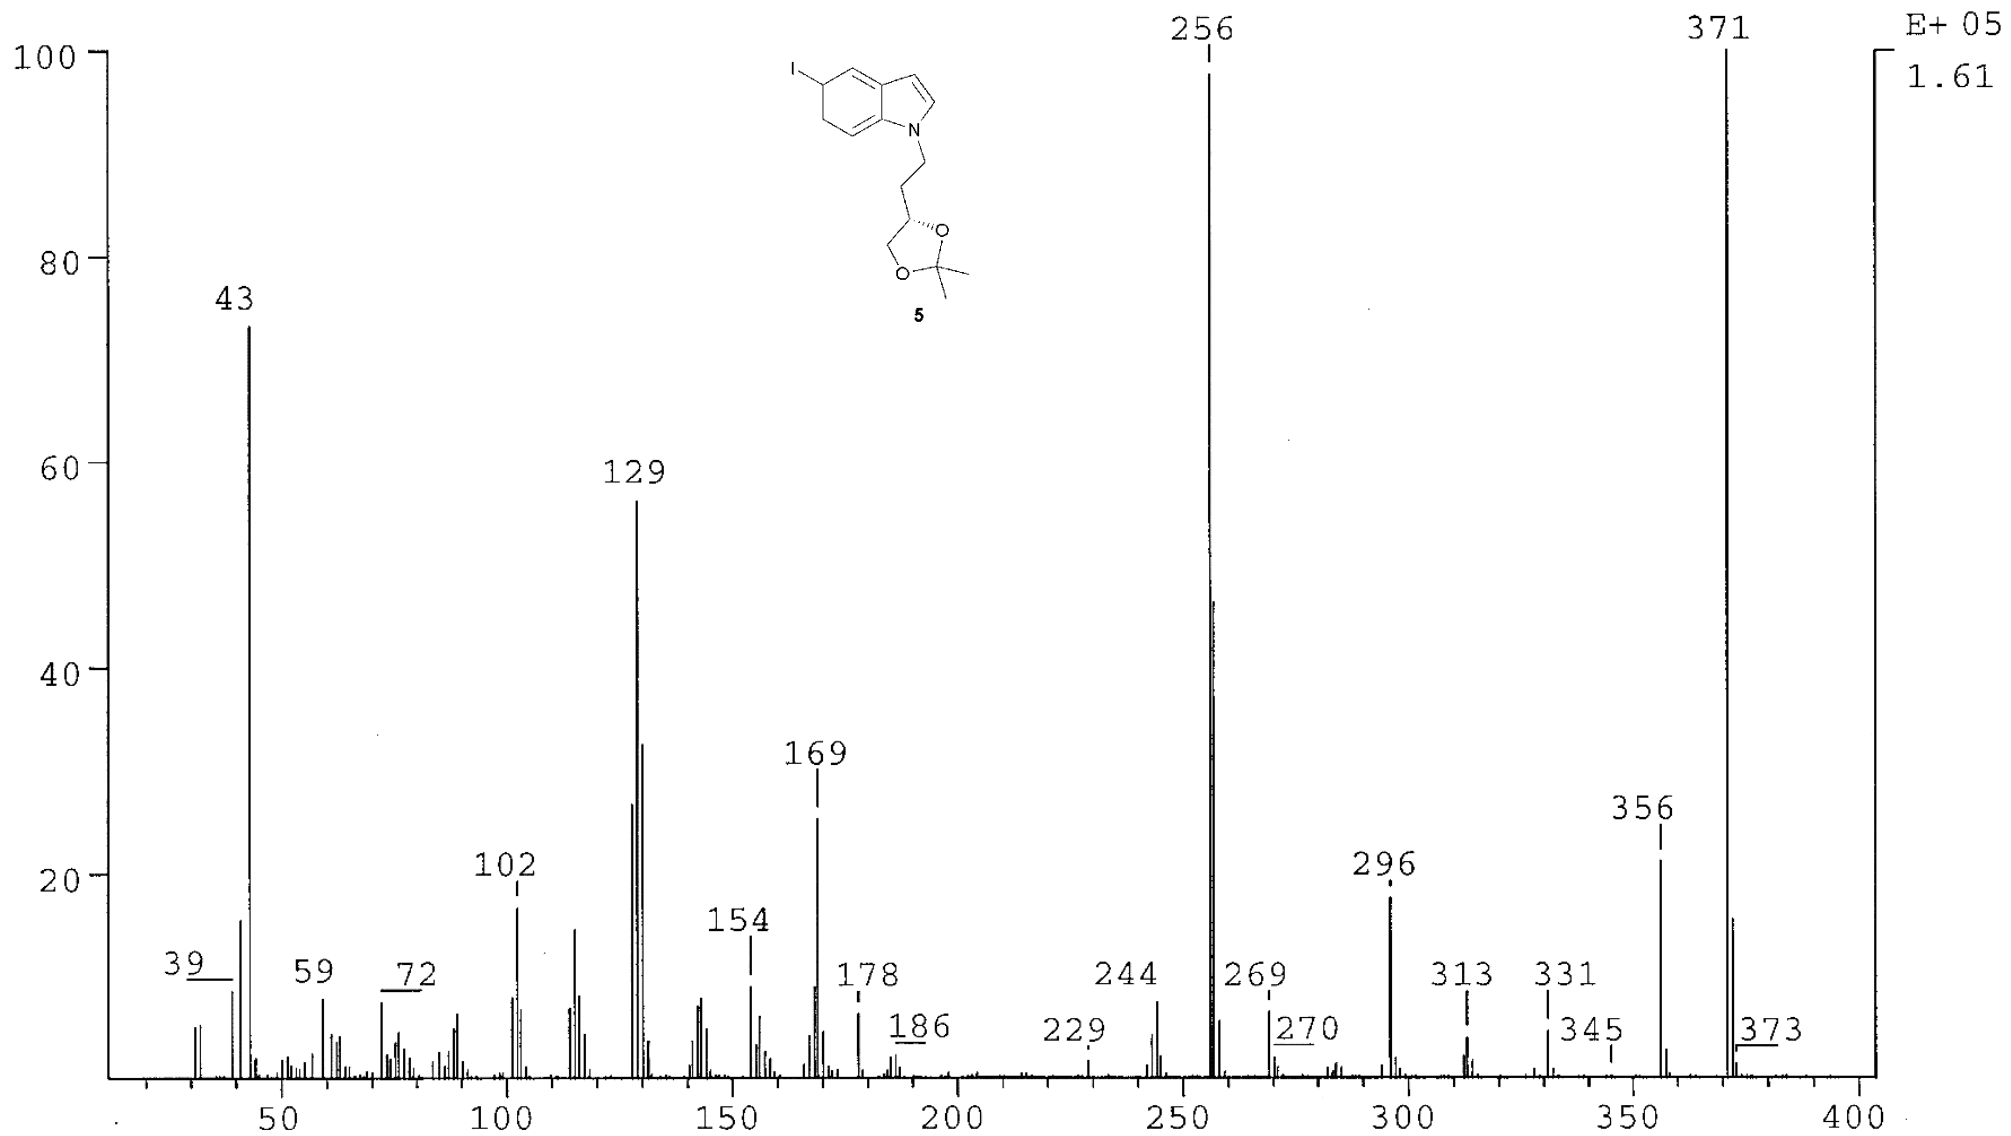

<sup>1</sup>H-NMR:

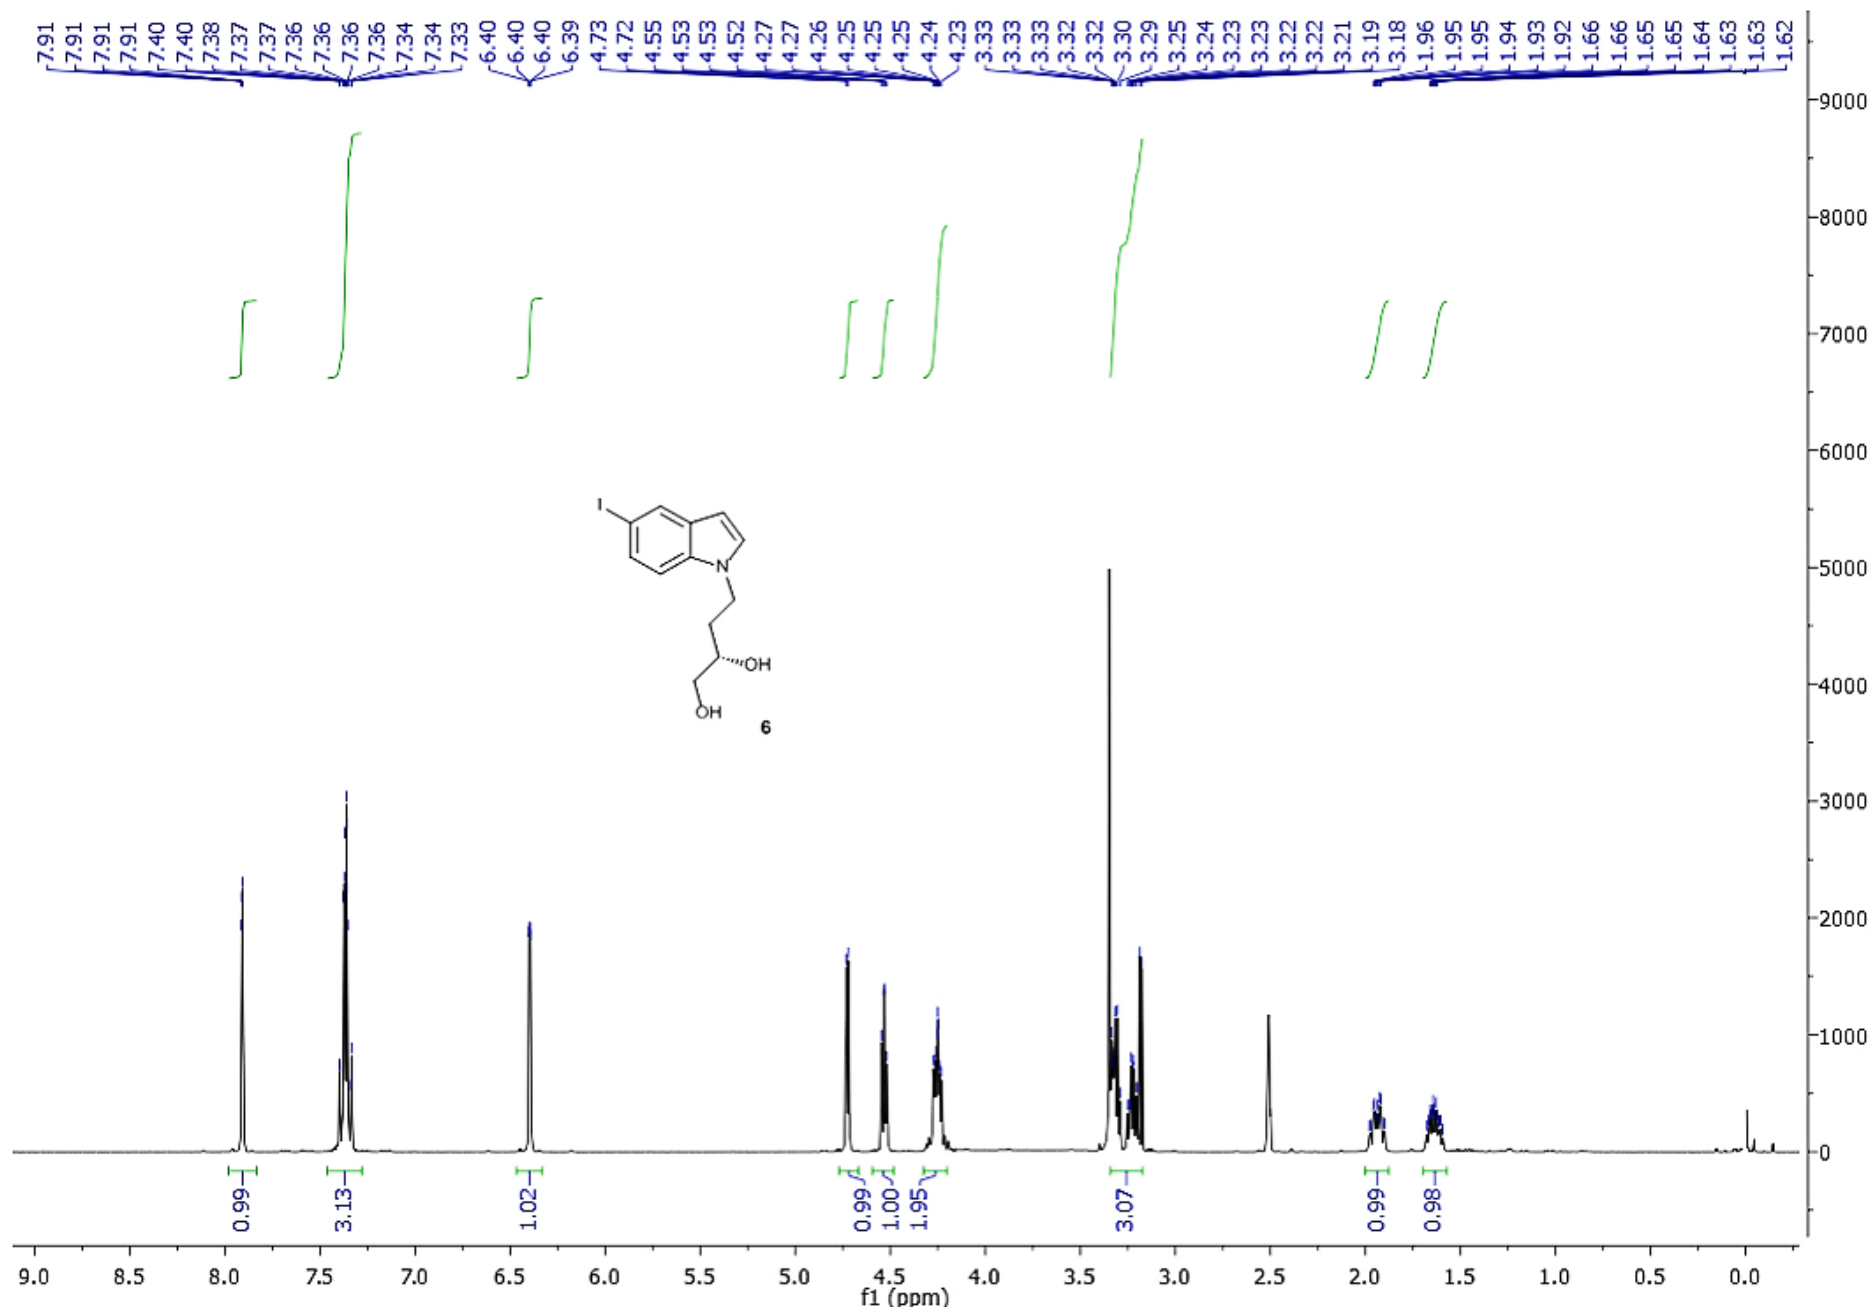

<sup>13</sup>C-NMR:

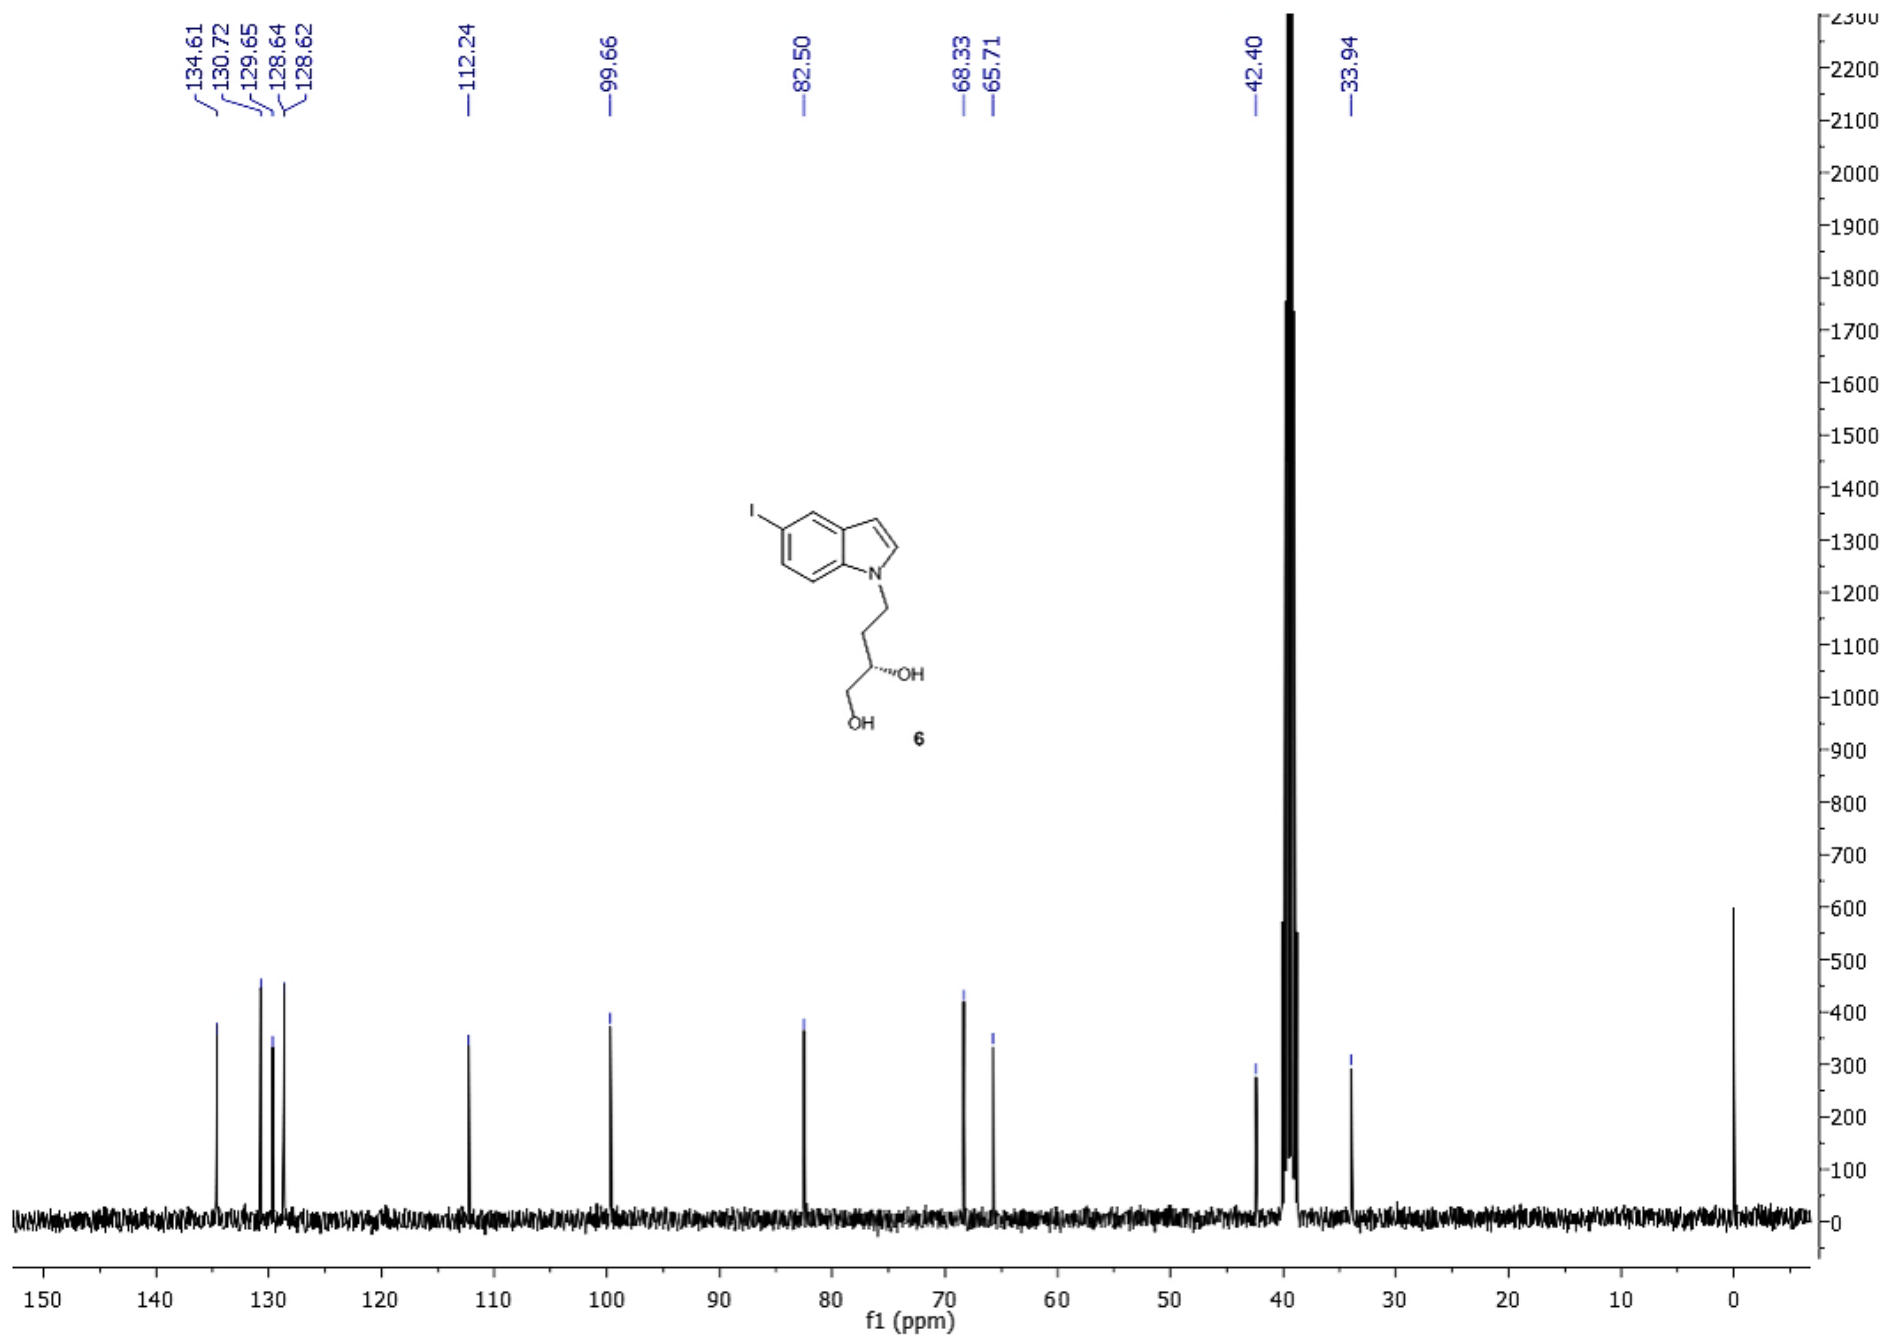

EI-MS:

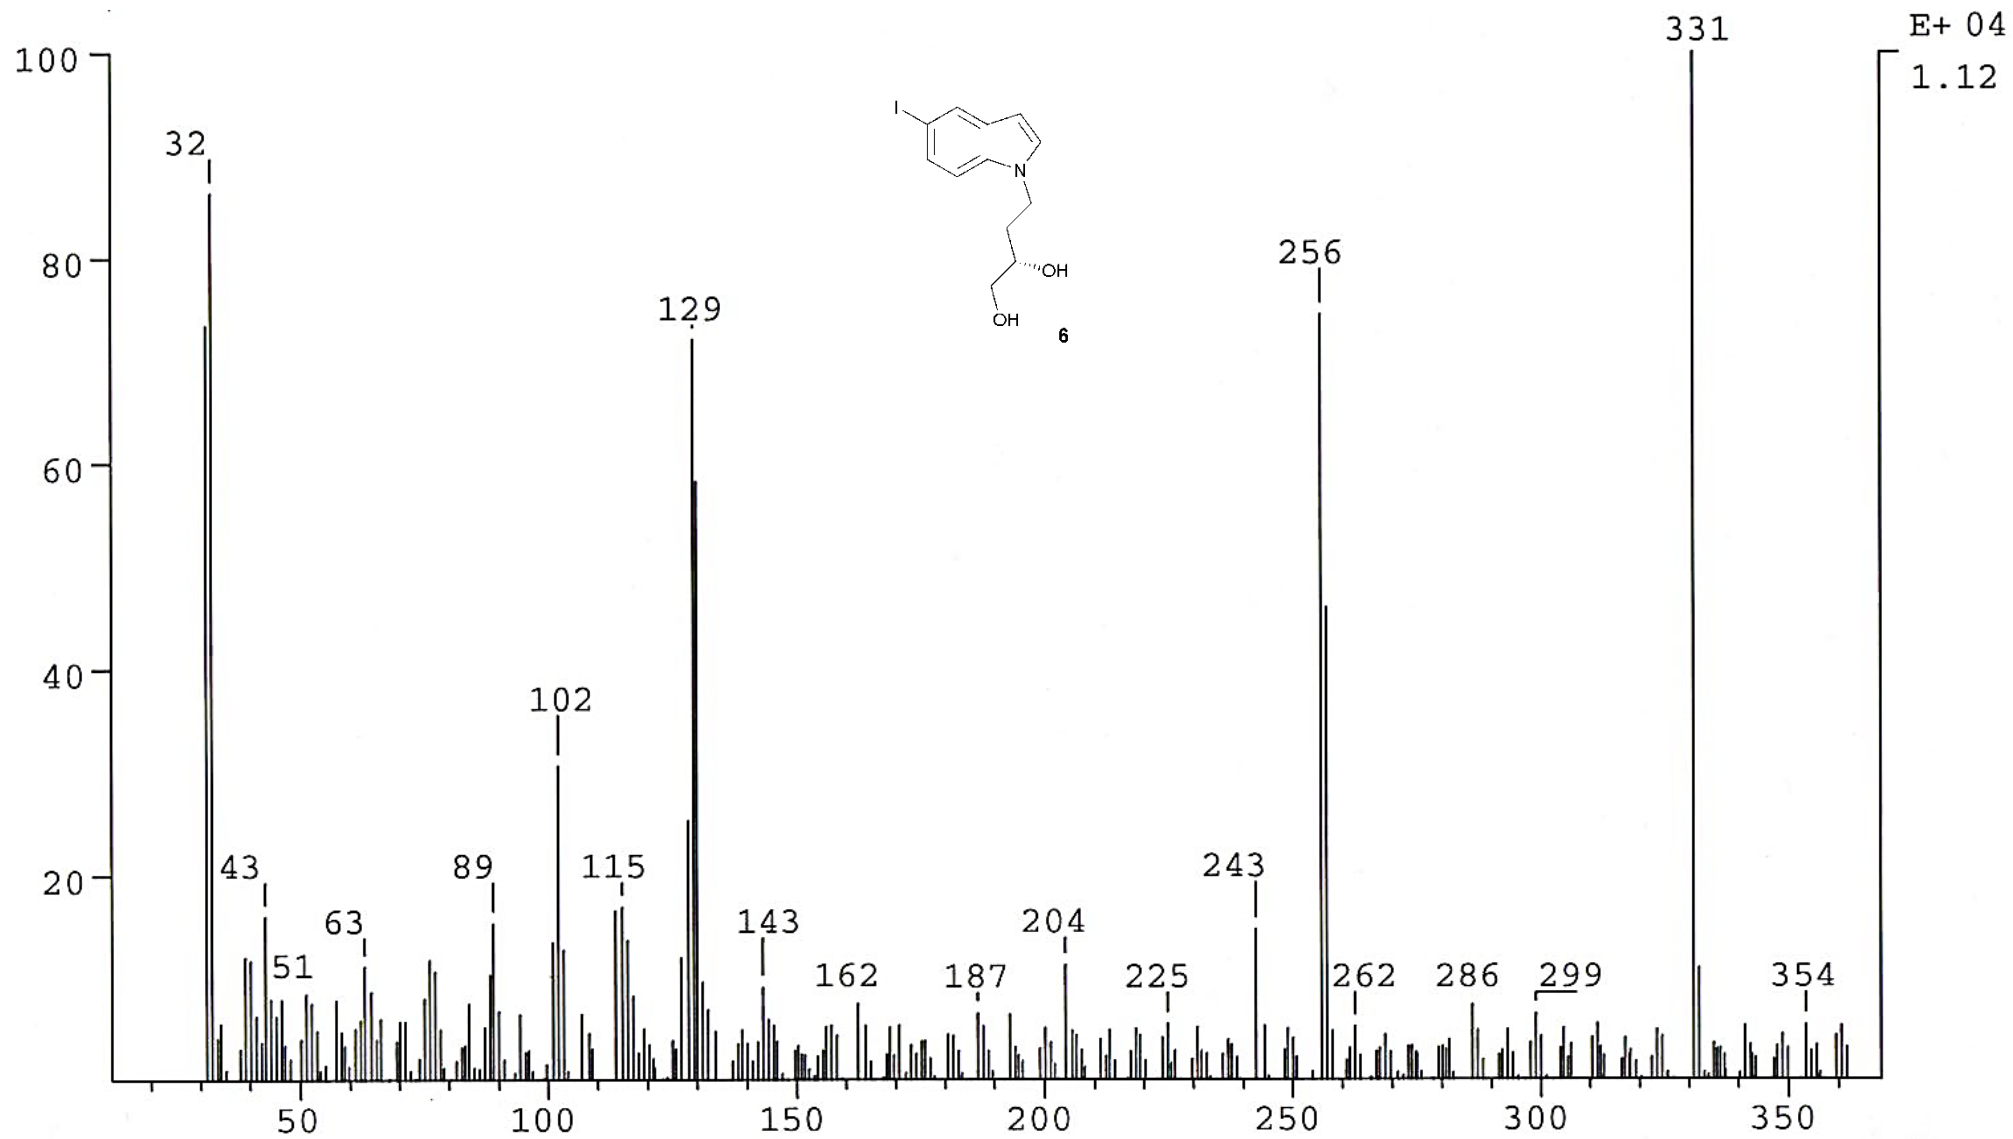

<sup>1</sup>H-NMR:

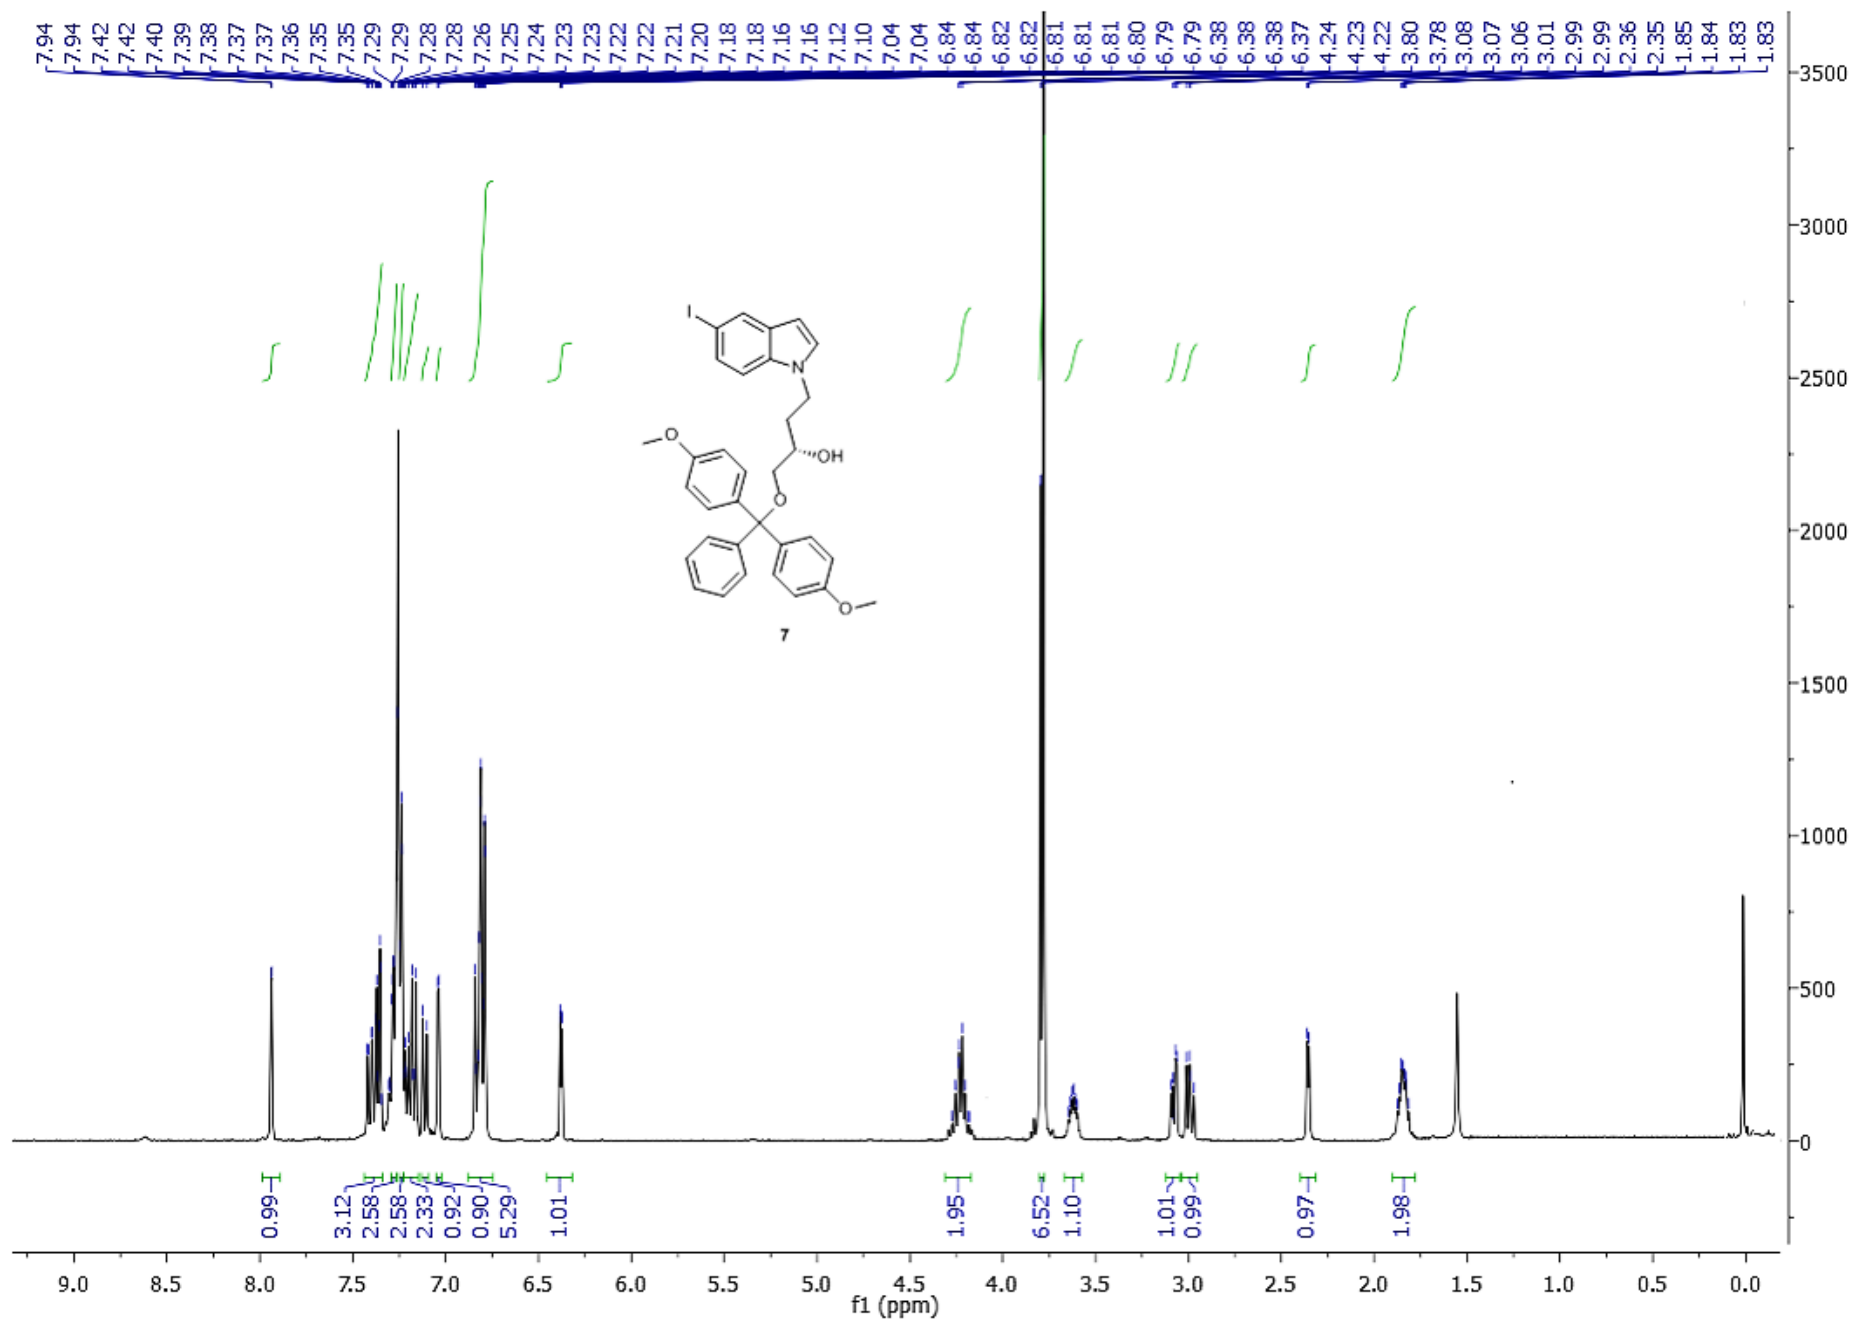

<sup>13</sup>C-NMR:

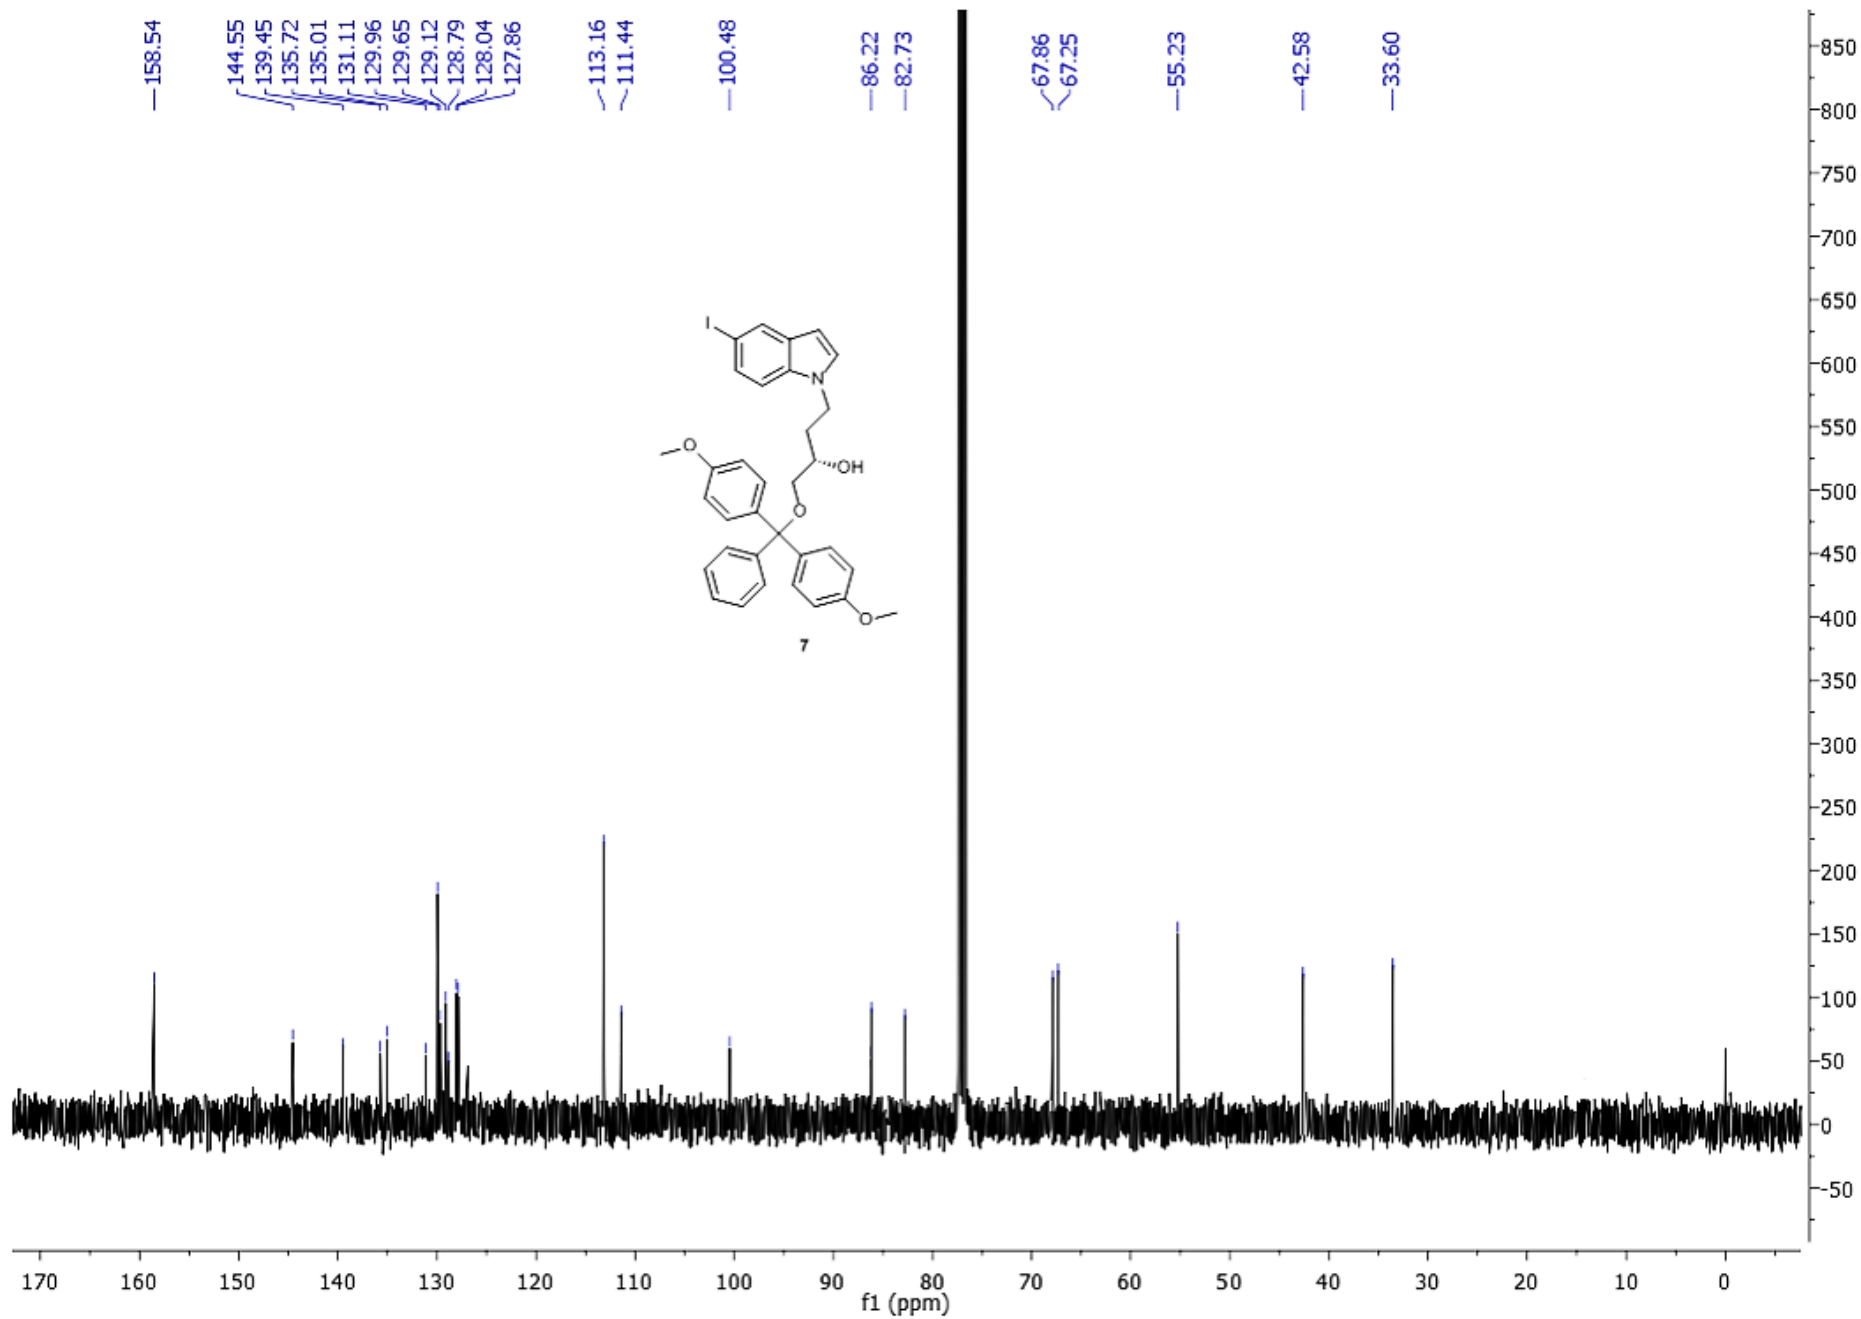



ESI-MS (TOF):

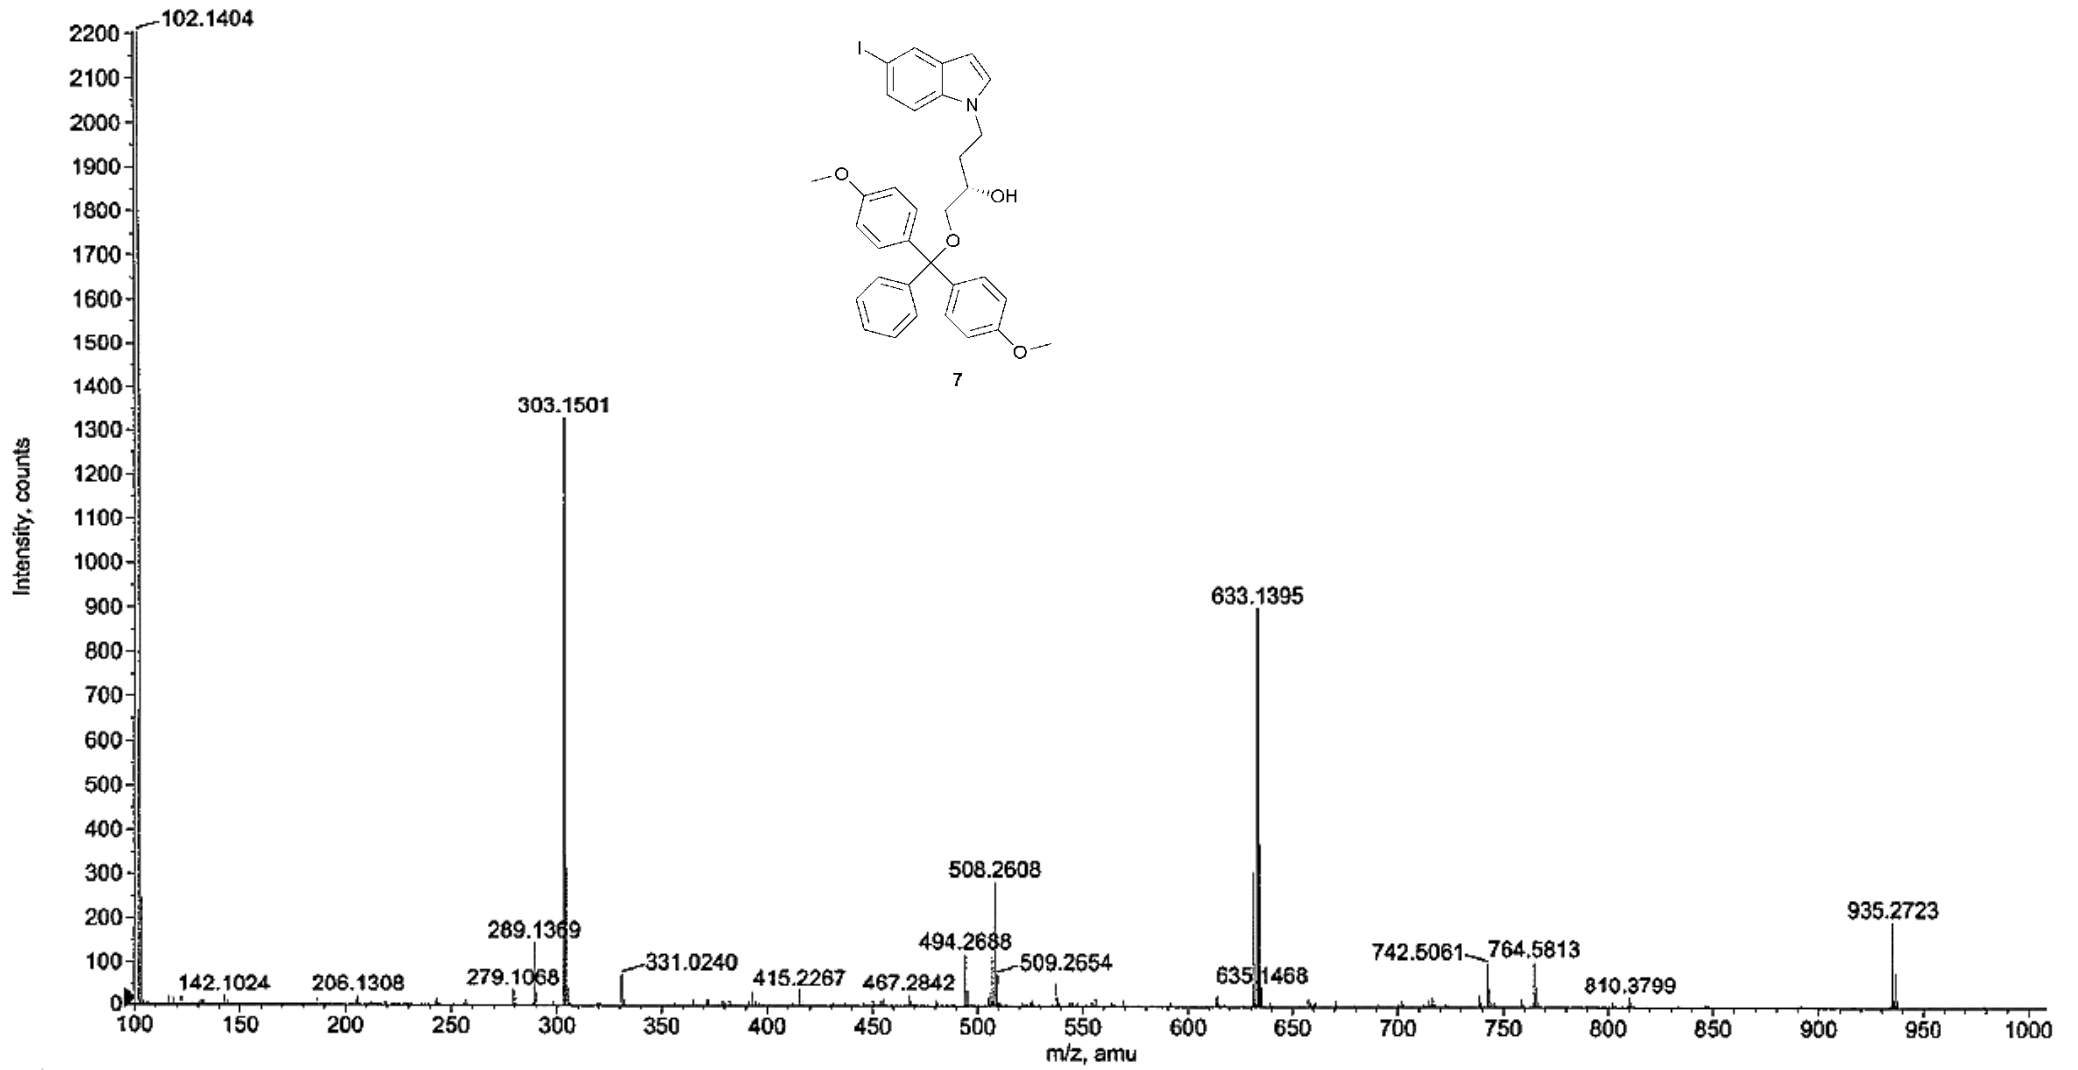

<sup>1</sup>H-NMR:

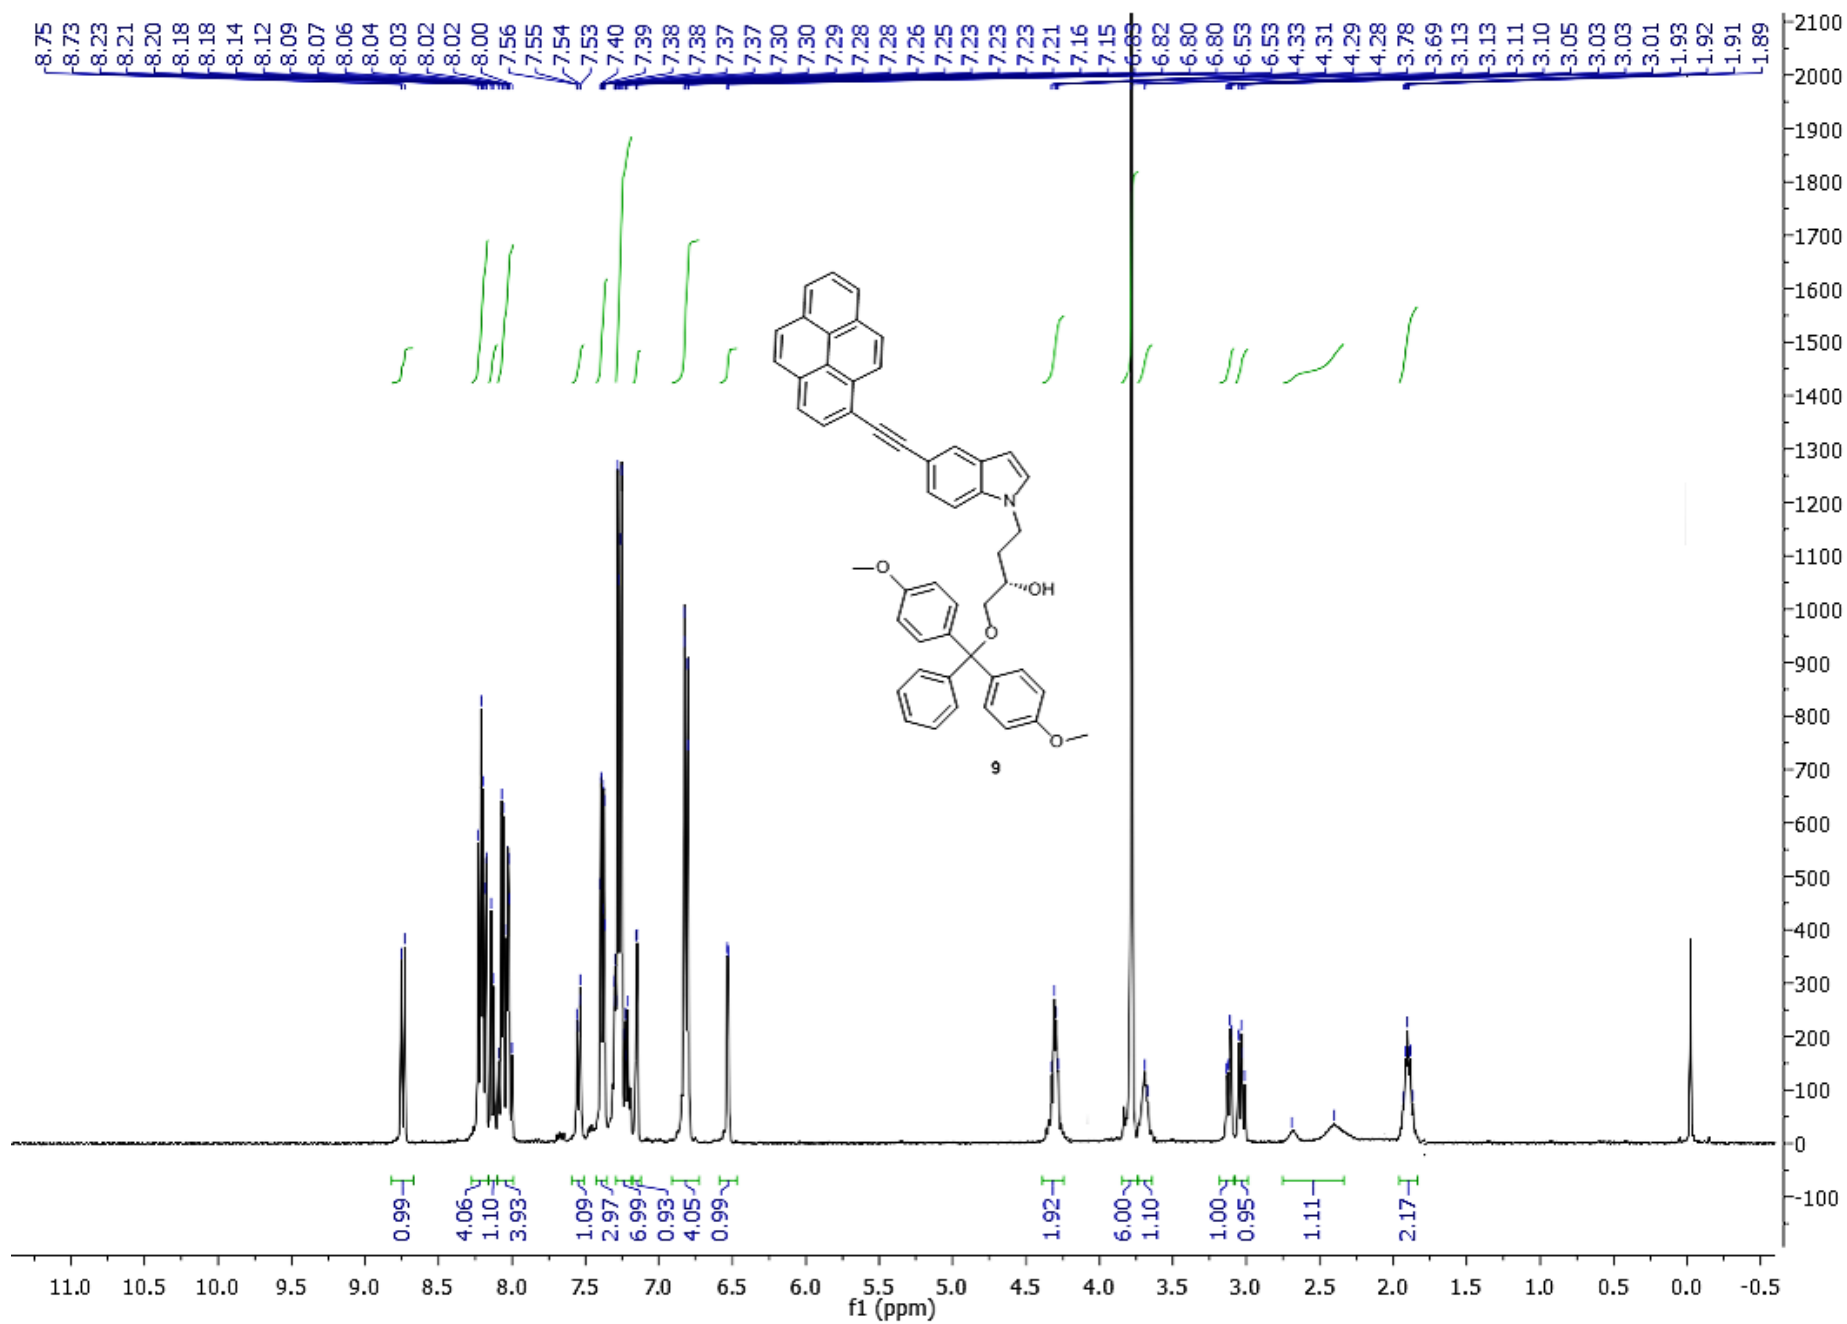

<sup>13</sup>C-NMR:

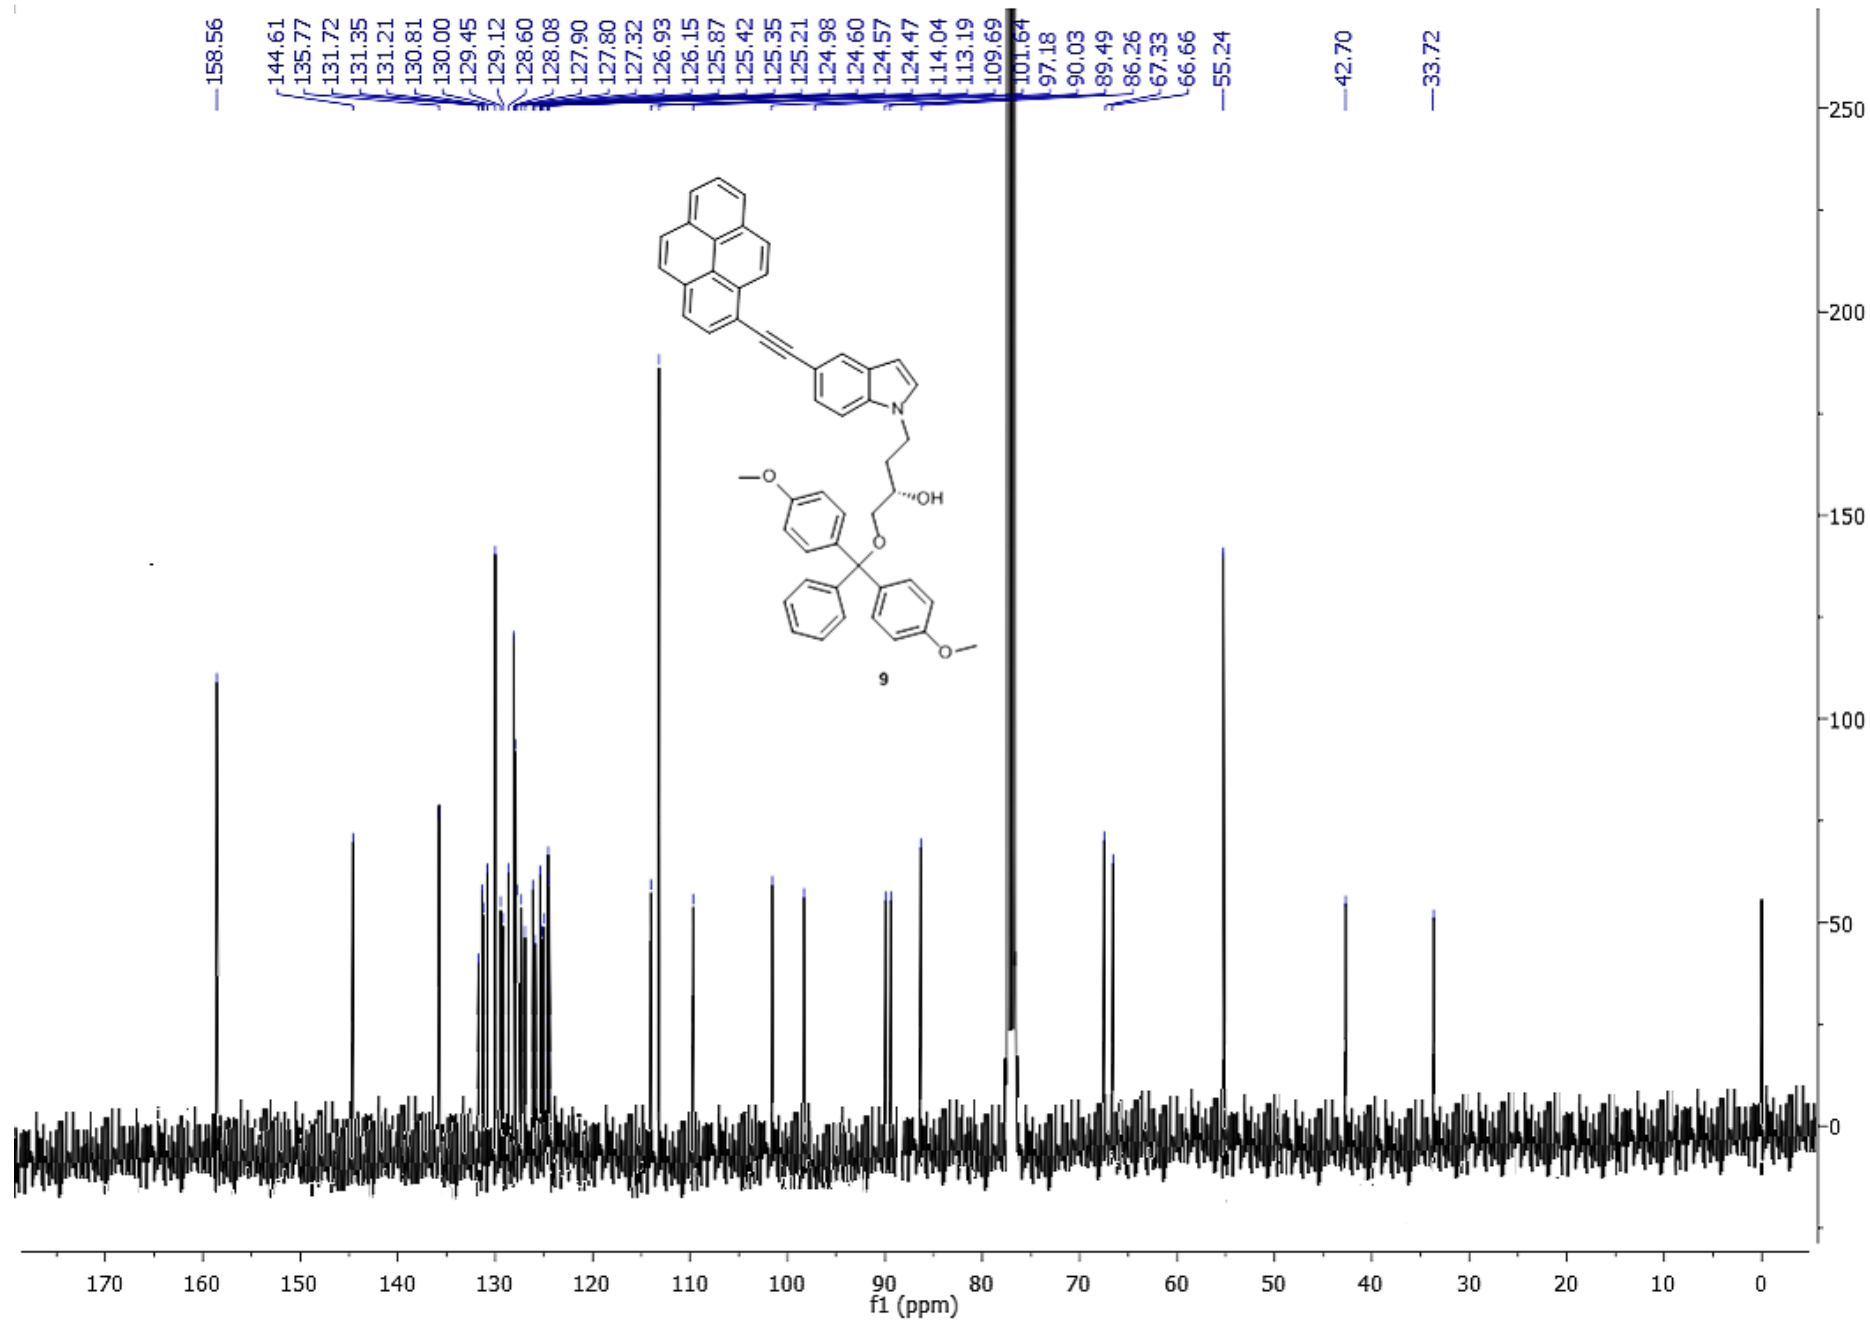

ESI-MS (TOF):

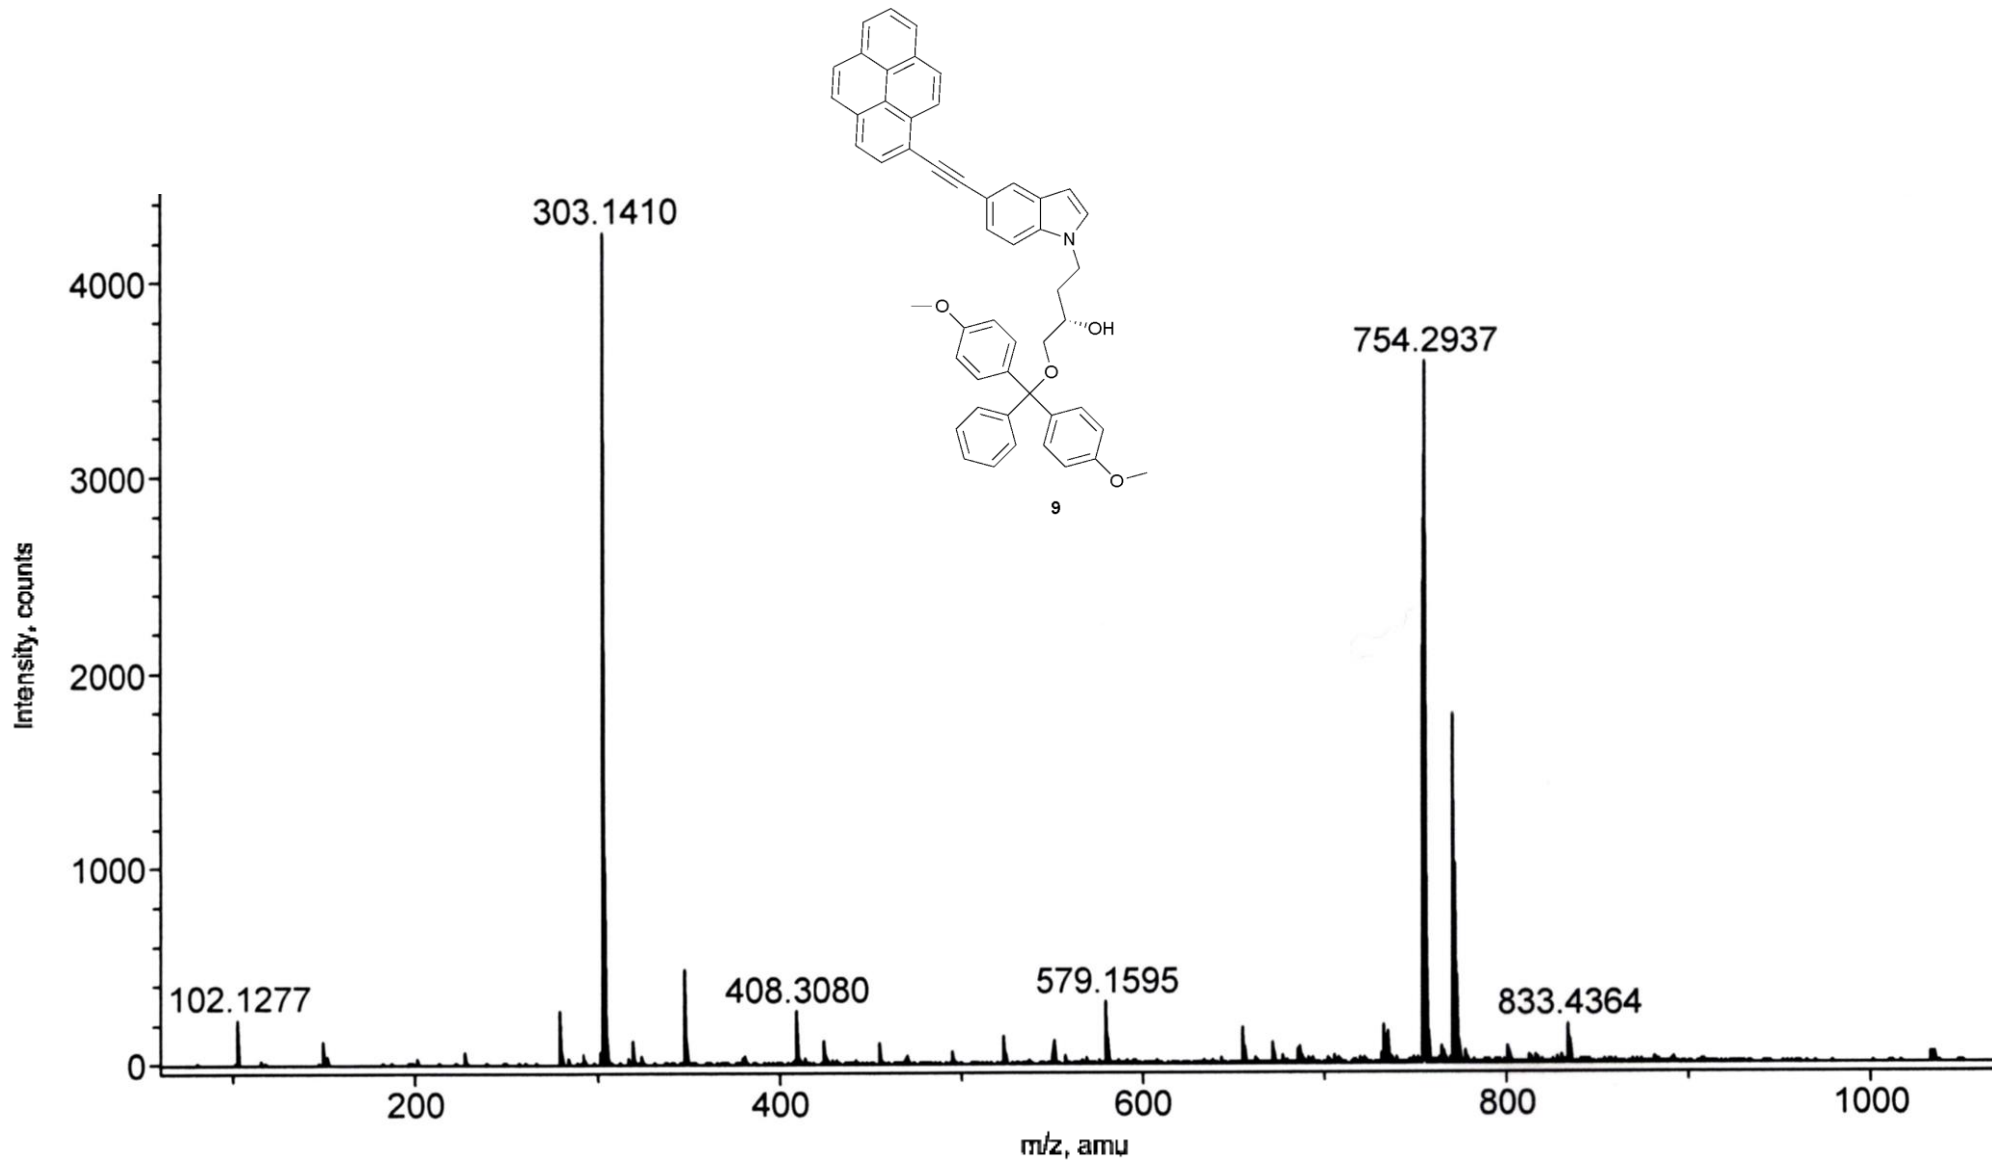

<sup>1</sup>H-NMR:

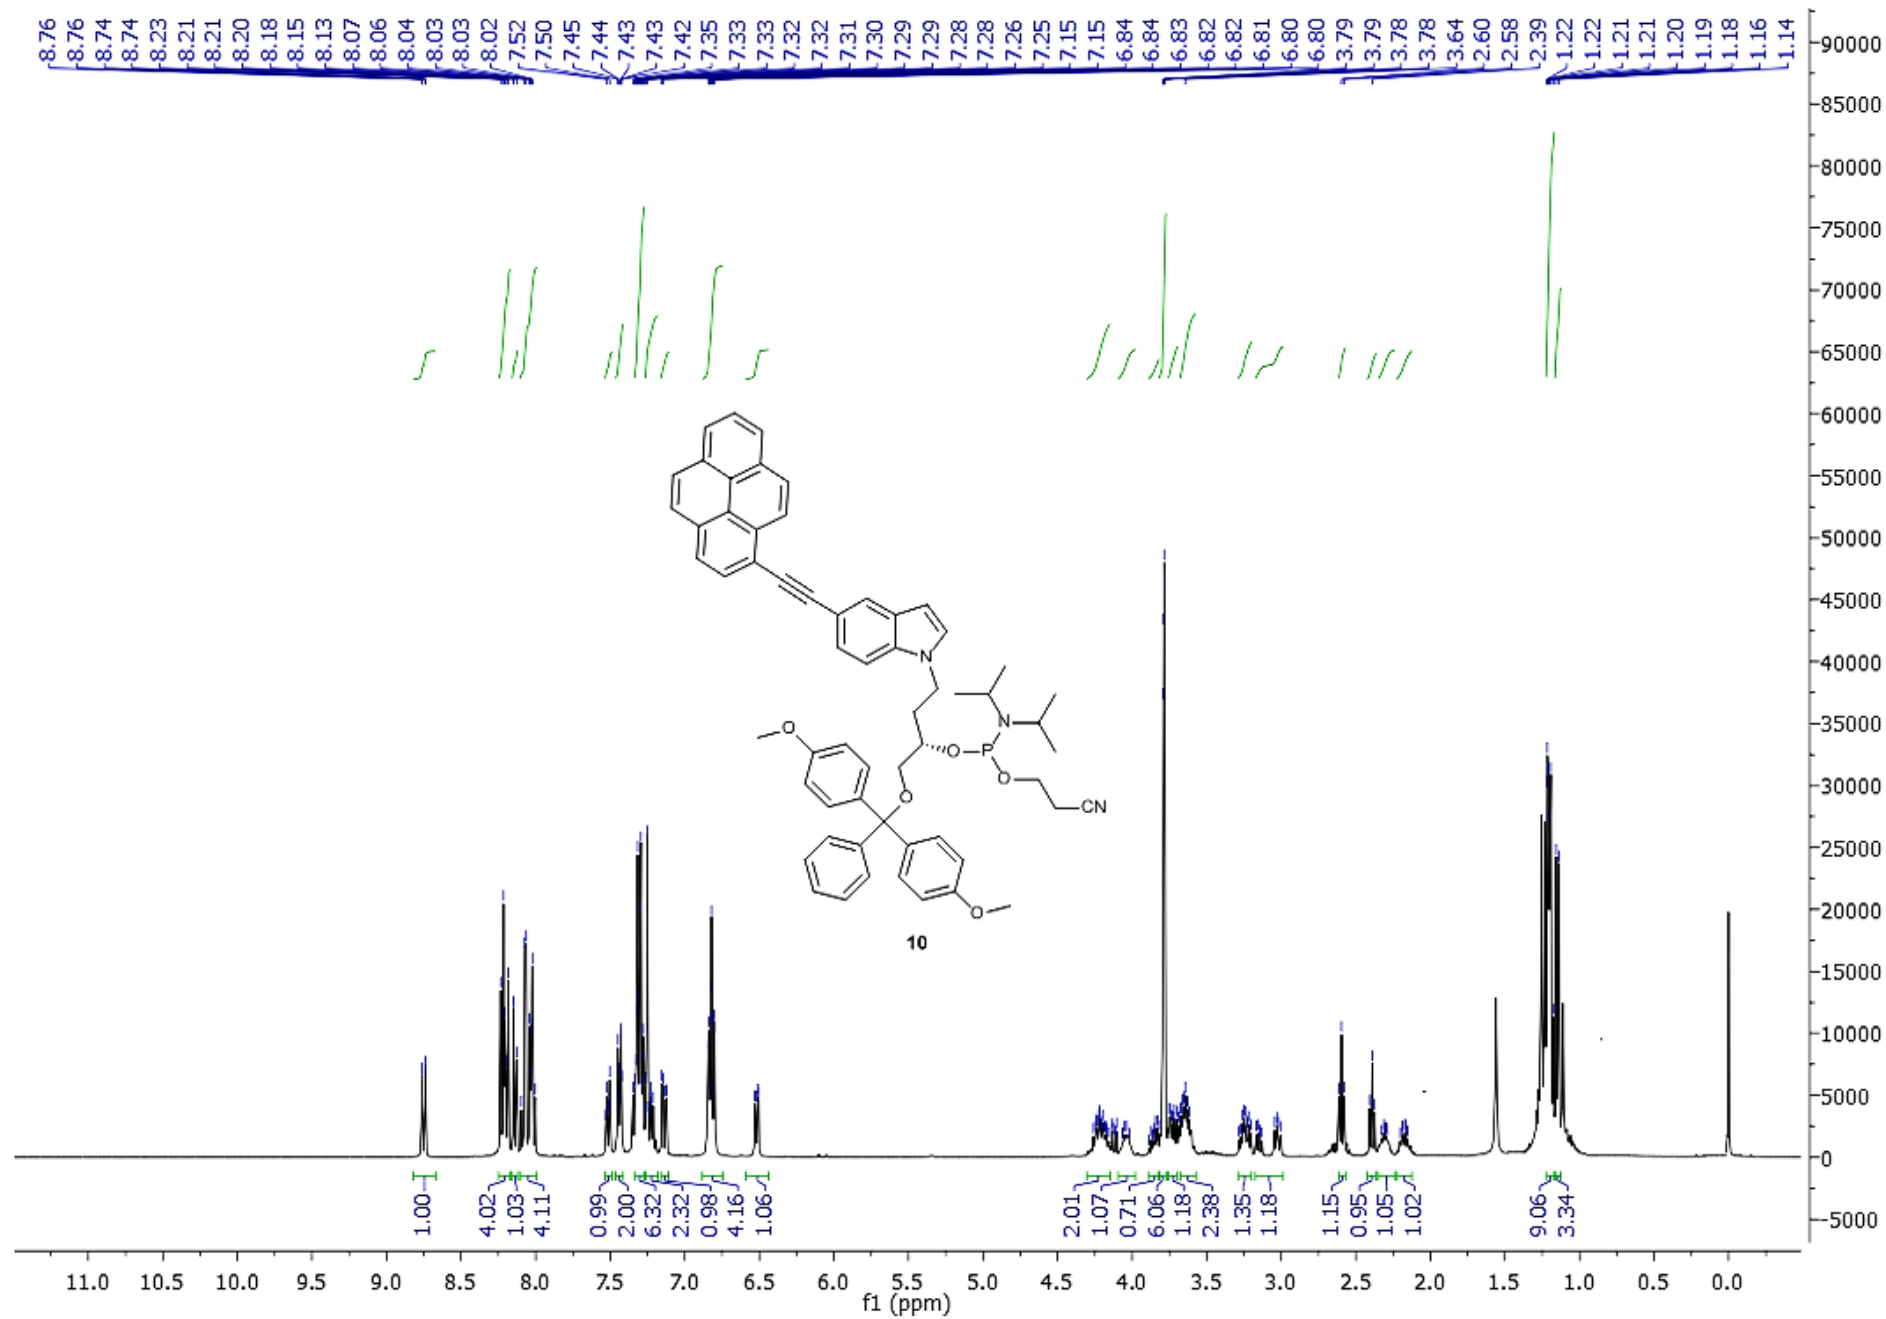

<sup>13</sup>C-NMR:

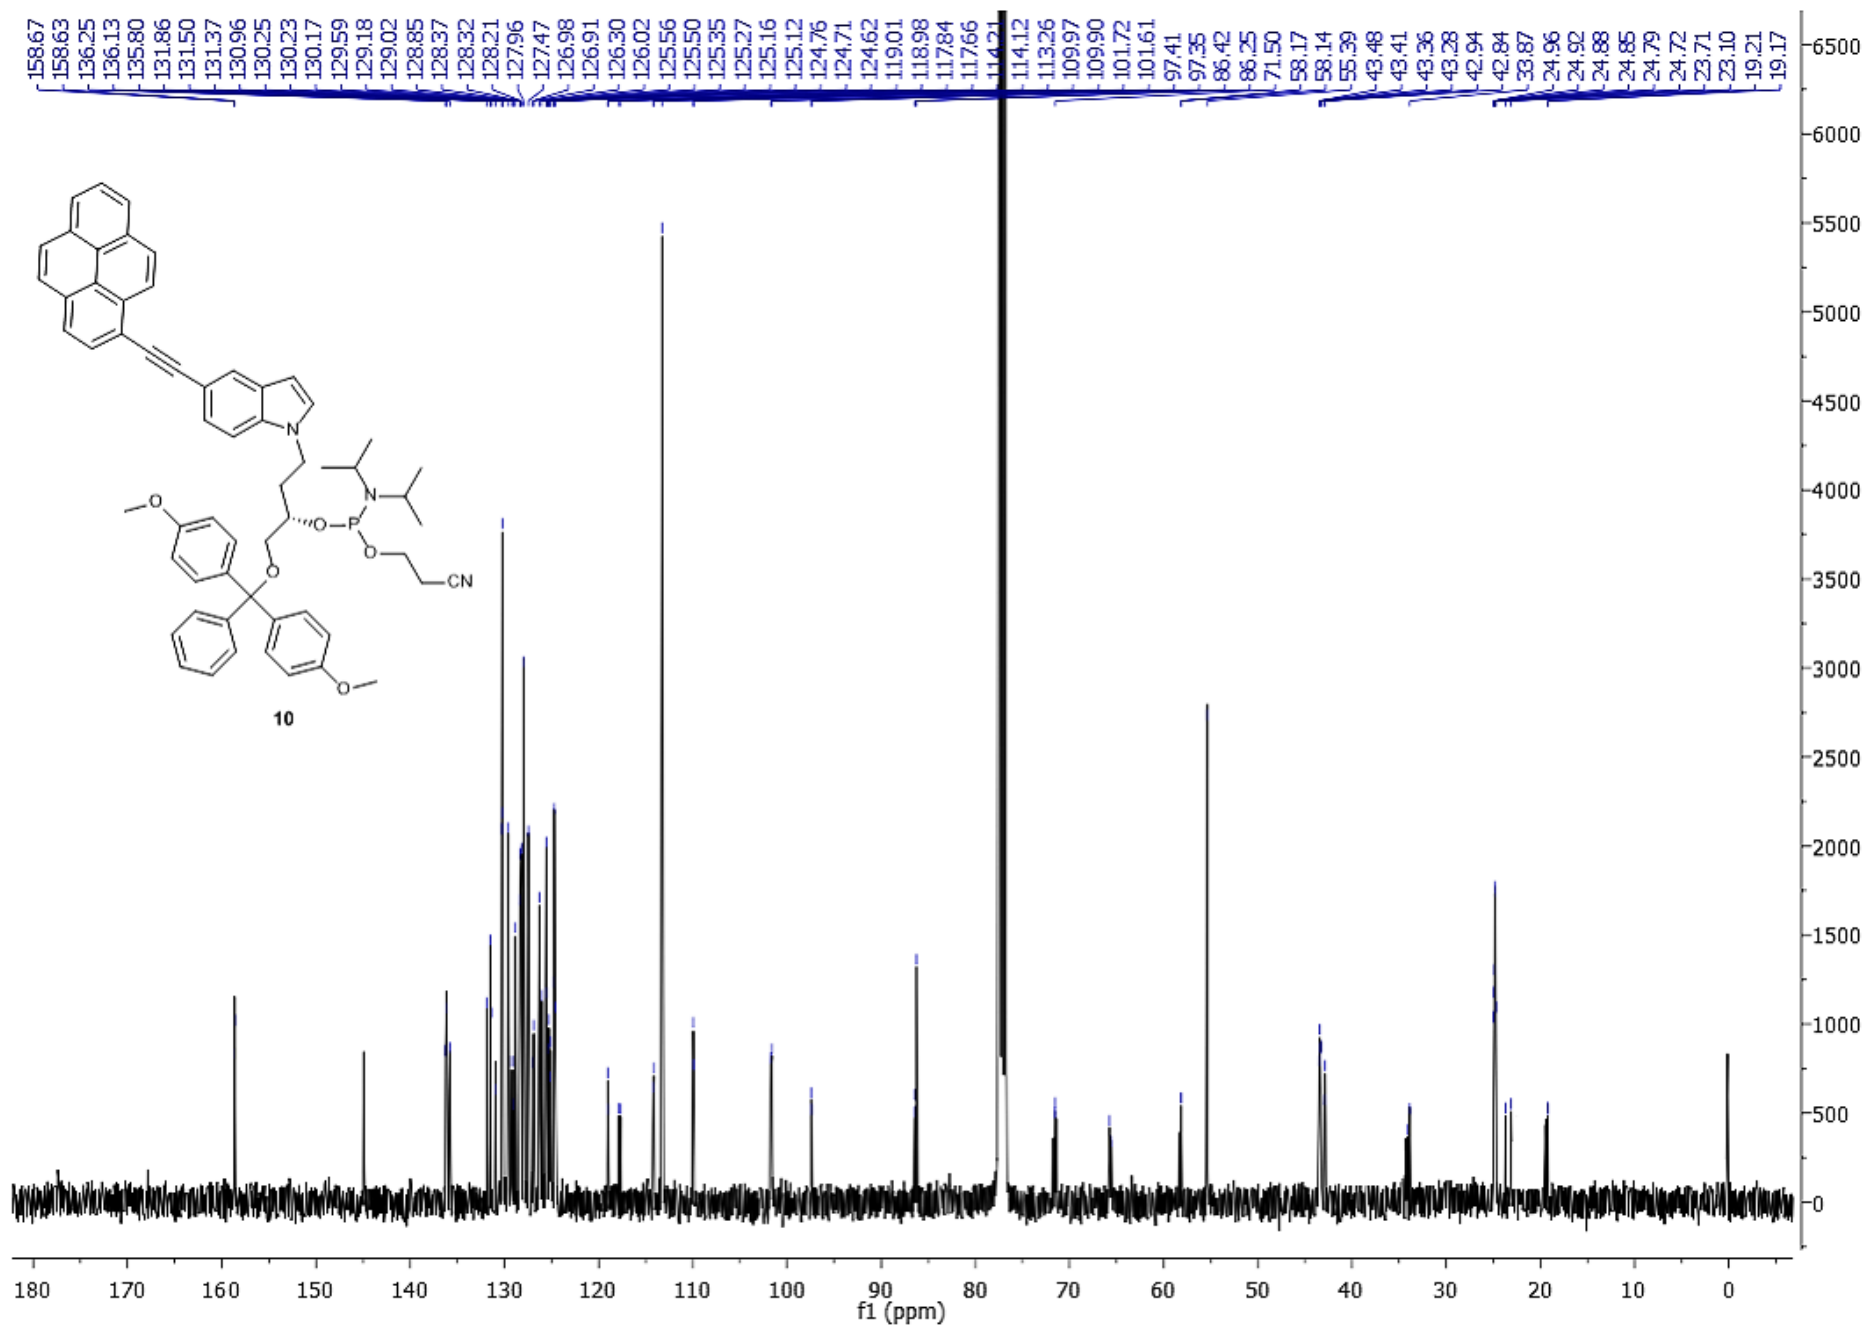

<sup>31</sup>P-NMR:

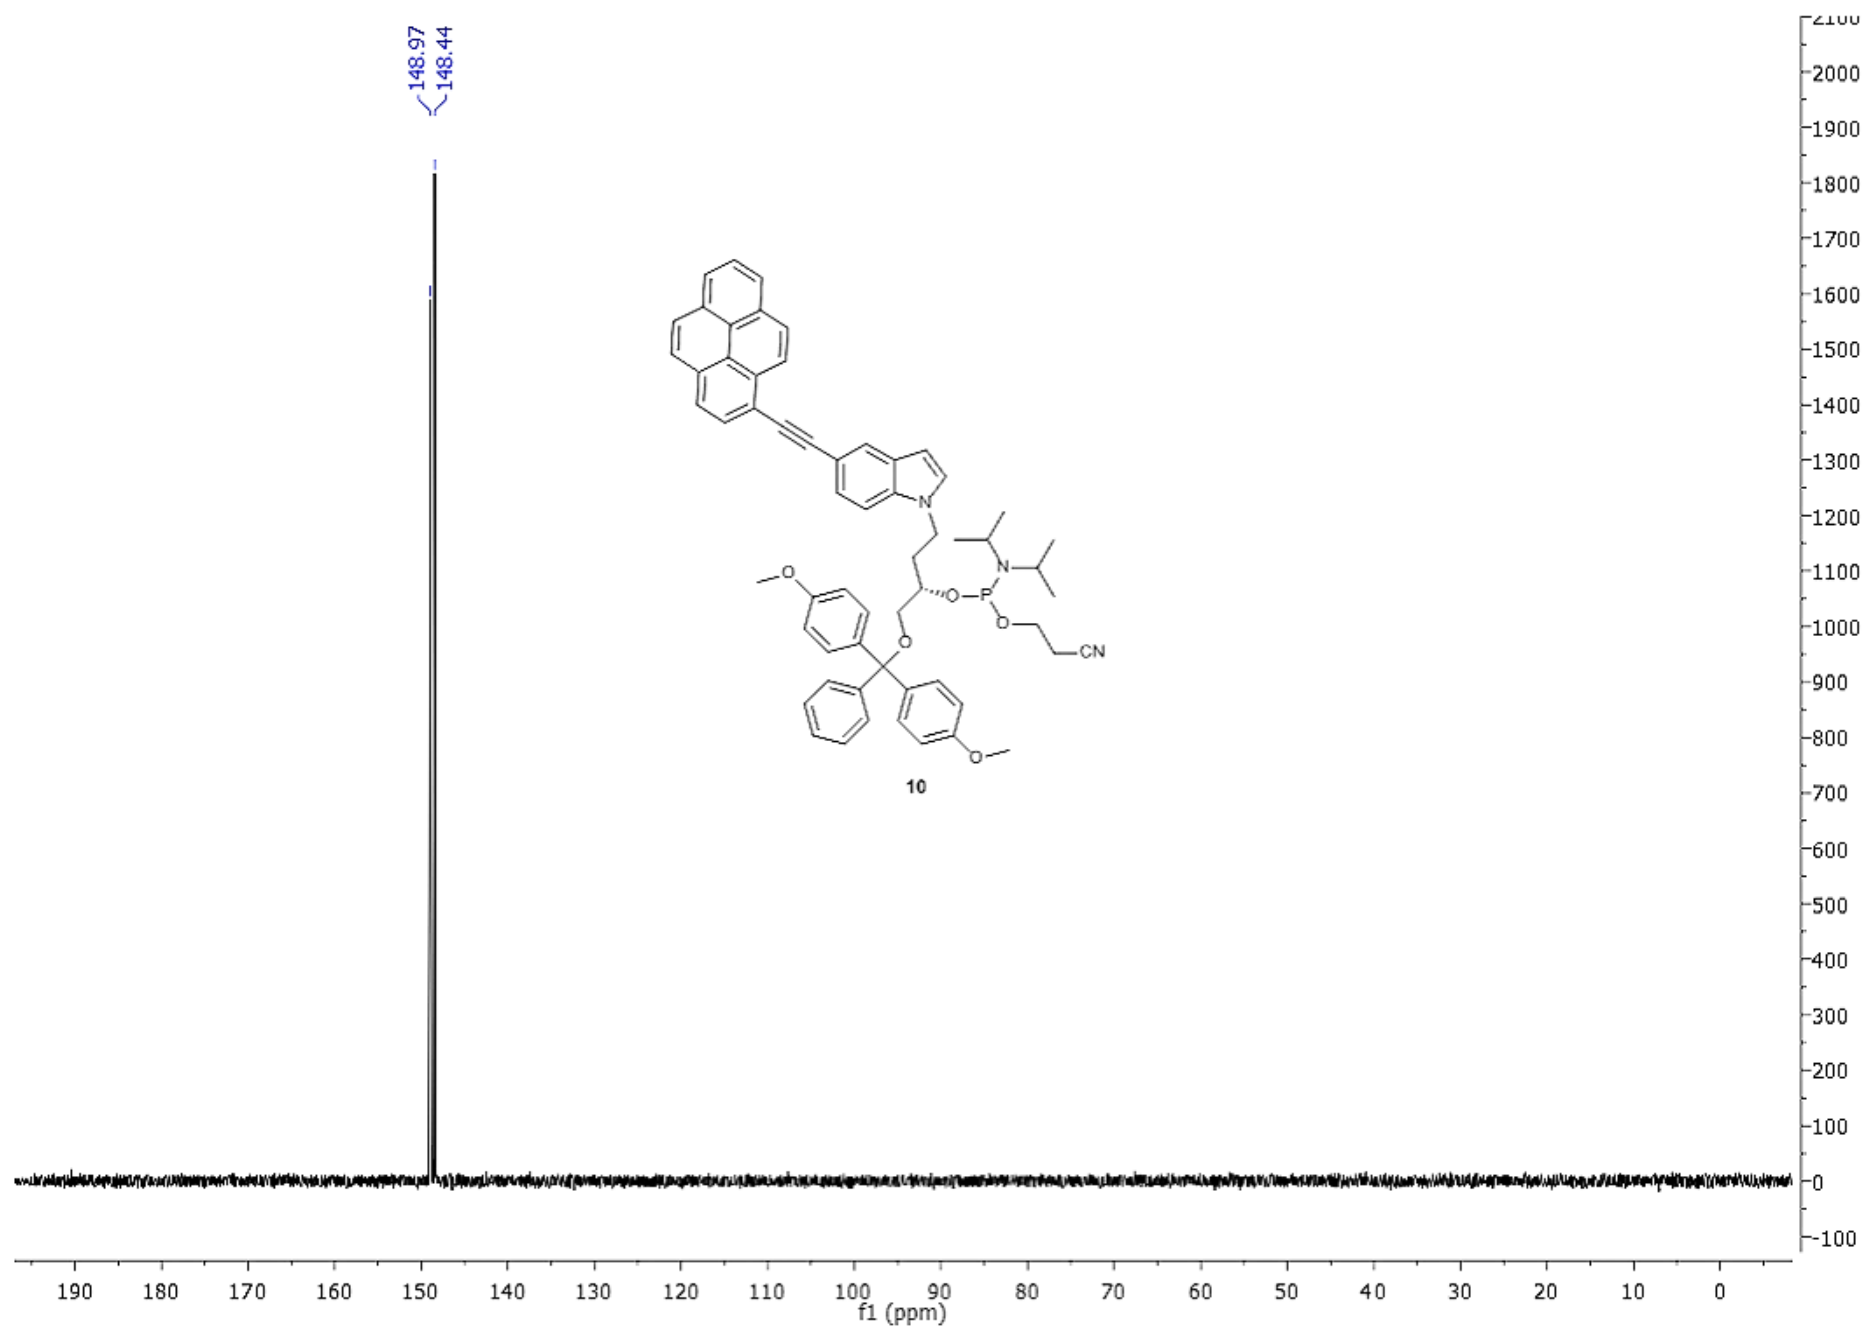

ESI-MS (TOF):

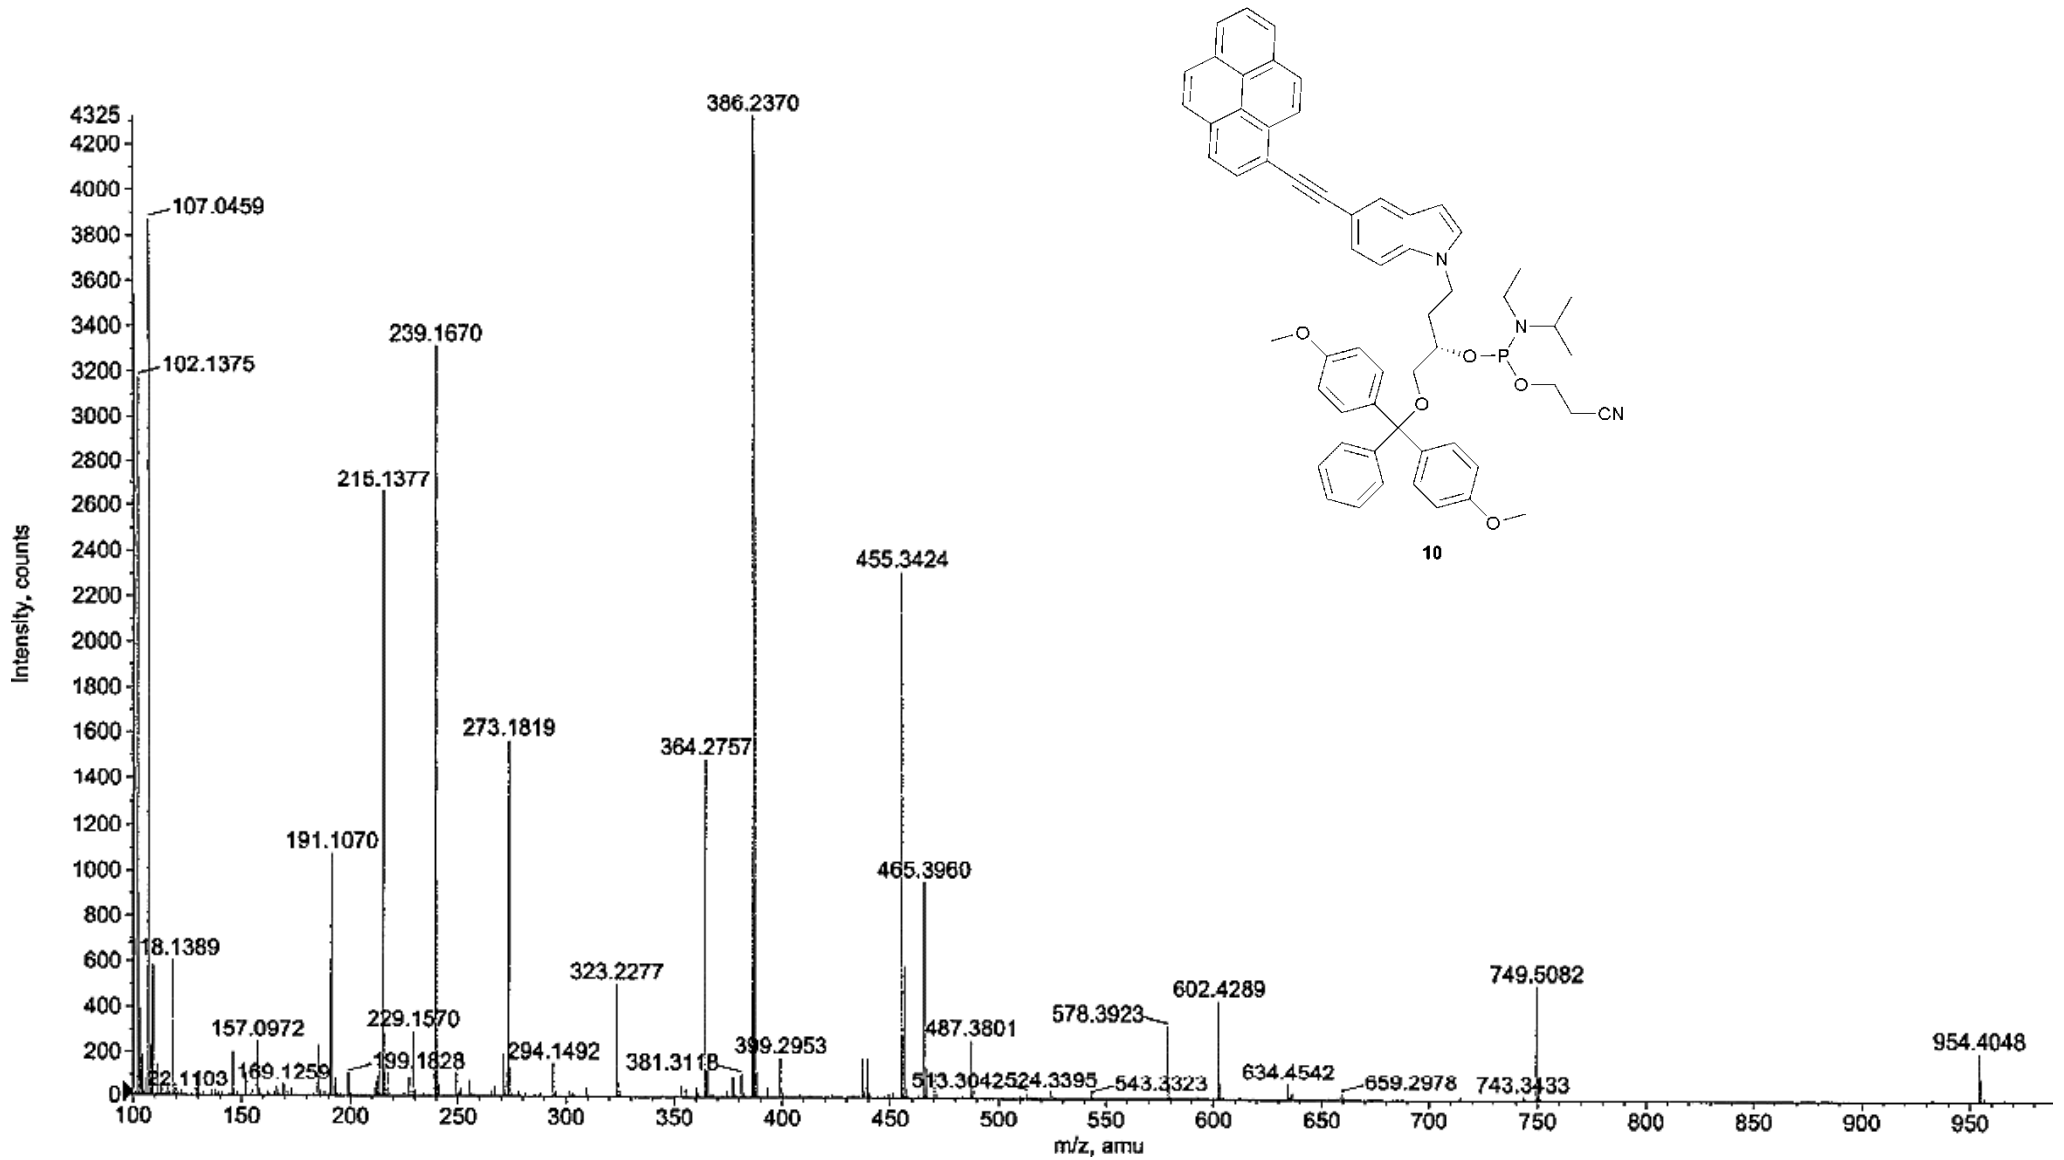

Supplement: d2ob01466a1.pdf [file d2ob01466a1.pdf]
